# Supplementary material
Source: Research Square preprint supplement (doi:10.21203/rs.3.rs-9599280/v1)
Supplement: Supplementary file 1 [file 2310109d55def6917954d936.xlsx]

## Sheet: Sheet1
Age	Gender	Location	Education	Spending	ATT_1	ATT_2	ATT_3	SN_1	SN_2	PBC_1	PBC_2	PBC_3	EC_1	EC_2	PGV_1	PGV_2	PGV_3	EG_1	EG_2	EG_3	EMR_1	IE_1	SME_1	SME_2	SME_3	IC_1	IC_2	IC_3	PSR_1	PSR_2	PSR_3	ASMC_1	ASMC_2	ASMC_3	HI_1	HI_2	HI_3	VI_1	VI_2	VI_3	HC_1	HC_2	HC_3	VC_1	VC_2	VC_3	PI_1	PI_2	PI_3
22	0	Cairo	Postgraduate degree	low	5	4	4	4	4	4	4	4	4	4	5	5	5	4	4	4	4	5	4	4	5	4	4	4	4	4	4	4	4	4	5	5	5	5	5	4	4	4	4	4	4	4	4	4	4
28	1	Cairo	Postgraduate degree	low	5	5	3	5	5	3	5	3	5	5	5	5	5	5	3	5	5	5	5	3	3	4	3	2	3	5	4	1	1	1	5	5	5	5	3	2	5	5	5	5	5	5	5	5	5
21	1	Cairo	High school diploma	low	4	4	4	2	2	4	5	2	5	5	3	5	5	4	3	3	2	5	3	1	3	1	1	1	1	1	1	4	4	4	5	5	5	5	3	3	5	3	1	5	5	3	3	5	4
20	0	Cairo	Bachelor’s degree	low	5	4	5	3	4	4	4	4	4	4	3	3	3	4	4	4	5	3	4	4	4	3	3	3	3	3	4	3	3	1	5	5	5	5	5	5	4	5	5	5	5	5	5	5	5
24	1	Cairo	Postgraduate degree	low	4	4	4	5	5	5	5	5	5	5	3	4	5	4	3	5	2	5	5	5	5	5	5	5	5	5	5	4	2	2	5	5	5	3	3	4	4	4	4	5	5	3	5	5	3
20	1	Cairo	High school diploma	moderate low	5	5	5	3	3	3	5	3	4	3	3	3	3	3	2	2	3	3	5	5	5	1	3	2	2	3	3	3	3	4	5	4	4	5	5	5	5	5	3	3	2	3	3	3	3
22	1	Cairo	High school diploma	moderate high	4	4	5	5	4	4	4	3	3	4	4	5	5	5	4	4	3	4	5	4	4	4	4	5	4	4	4	4	2	4	4	4	3	4	3	4	4	4	4	5	4	3	4	3	4
22	0	Cairo	High school diploma	low	3	3	3	3	3	3	3	3	3	3	3	3	3	3	3	3	3	3	3	3	3	3	3	3	3	3	3	3	3	3	4	4	4	4	2	2	4	4	3	3	4	4	3	3	3
23	1	Cairo	Bachelor’s degree	moderate high	5	5	4	3	4	4	2	4	3	2	5	2	5	4	3	4	3	5	3	4	3	4	2	1	3	4	5	5	3	4	4	4	5	4	4	5	3	3	4	3	4	2	2	3	4
21	0	Cairo	Bachelor’s degree	low	4	3	3	4	5	3	3	2	5	4	4	3	5	3	4	4	5	5	4	4	3	2	2	2	2	3	3	2	2	2	5	3	3	3	3	4	5	5	5	5	5	5	4	3	4
23	0	Cairo	Bachelor’s degree	I prefer not to say	5	3	3	3	3	4	3	2	3	3	4	5	5	5	3	3	4	4	3	3	3	3	3	4	3	3	2	4	2	2	5	5	5	5	5	4	5	5	4	4	3	3	5	4	2
21	1	Cairo	Bachelor’s degree	moderate low	5	4	5	3	3	4	4	3	4	3	3	3	5	2	3	3	3	5	4	4	4	3	4	4	3	5	4	5	4	5	4	3	4	5	5	4	5	3	5	4	5	4	3	4	5
21	1	Cairo	Bachelor’s degree	low	3	2	2	1	1	3	3	5	5	1	1	3	1	1	1	1	1	1	2	1	5	1	1	1	1	1	1	1	1	1	1	1	1	1	1	1	1	1	1	1	1	1	1	1	1
24	0	Cairo	High school diploma	low	5	3	4	4	3	5	4	3	2	1	3	4	3	2	1	2	5	4	3	1	1	1	1	1	3	3	1	3	3	2	5	5	5	3	5	5	5	5	3	4	5	3	3	3	3
23	0	Cairo	Some university	low	3	3	4	4	4	4	4	4	4	4	4	5	3	3	3	3	4	4	3	3	3	3	3	4	3	3	4	3	3	3	3	3	3	3	3	3	3	3	3	3	3	3	4	3	3
21	1	Cairo	Bachelor’s degree	low	4	4	4	3	3	4	5	5	3	4	4	3	4	1	5	4	4	5	4	4	1	1	2	2	2	2	4	4	4	4	5	5	5	5	2	2	5	5	3	5	5	5	4	4	4
23	0	Cairo	Some university	low	2	2	2	2	2	2	2	2	2	2	2	2	2	2	2	2	2	2	2	2	2	2	2	2	2	2	2	2	2	3	2	2	2	2	2	2	2	2	2	2	2	2	2	2	2
20	1	Cairo	Some university	low	2	3	3	2	4	2	3	3	3	3	3	3	3	3	3	3	3	2	3	3	3	3	3	3	3	3	3	3	3	3	3	3	3	3	3	3	3	3	3	3	3	3	3	3	3
22	1	Cairo	Some university	moderate low	4	4	4	4	3	3	4	3	3	4	4	3	3	3	3	3	3	4	3	3	3	3	3	3	3	3	3	3	3	3	3	3	3	3	3	3	3	3	3	3	3	3	3	3	3
20	1	Cairo	Bachelor’s degree	low	2	1	1	4	4	2	2	1	3	2	3	1	5	2	3	3	4	2	2	5	1	3	3	2	3	3	4	5	5	4	5	5	4	4	2	2	5	4	5	4	4	5	1	1	1
21	1	Cairo	Some university	moderate low	3	4	3	4	4	2	2	4	2	3	3	3	3	3	1	3	3	3	5	5	5	5	5	5	5	5	5	5	5	1	5	3	5	5	5	5	4	3	3	5	5	5	4	4	3
22	0	Cairo	Some university	low	5	3	5	5	4	5	5	2	5	5	5	5	5	5	5	5	5	3	5	2	2	3	2	3	4	4	5	5	5	2	5	3	5	4	4	4	4	5	4	5	5	5	3	5	5
20	1	Cairo	Bachelor’s degree	moderate low	5	5	5	5	5	5	5	5	5	5	5	5	5	5	5	5	5	5	5	5	5	5	5	5	5	5	5	5	5	5	5	5	5	5	5	5	5	5	5	5	5	5	5	5	5
21	1	Cairo	Some university	low	3	3	2	3	3	3	3	3	3	3	3	3	3	3	3	3	3	3	3	3	3	3	3	3	3	3	3	3	3	3	3	3	3	3	3	3	3	5	3	5	5	4	3	3	3
20	1	Cairo	Some university	low	5	5	5	5	5	2	5	2	5	5	5	5	5	3	4	5	5	5	5	5	1	3	5	1	5	5	5	5	3	2	5	4	5	5	5	5	5	3	3	5	5	5	5	5	5
23	0	Cairo	Some university	low	3	4	3	4	4	3	4	3	2	4	3	4	4	4	4	3	3	3	4	3	3	3	3	3	4	3	2	2	1	2	4	3	2	3	5	5	5	5	5	5	5	5	3	3	3
21	1	Cairo	Some university	I prefer not to say	5	5	5	5	5	5	5	5	5	5	5	5	3	2	2	3	5	5	2	3	5	3	4	3	3	2	3	5	4	3	3	4	3	4	4	2	2	1	2	2	4	4	2	4	3
19	1	Cairo	High school diploma	moderate low	5	5	5	5	5	5	5	5	3	5	4	5	5	5	1	5	5	5	5	5	5	2	5	5	5	5	4	5	4	4	5	4	5	5	5	4	4	5	5	3	5	4	4	5	5
20	0	Cairo	Postgraduate degree	I prefer not to say	2	2	2	2	2	2	2	2	2	3	3	3	3	3	3	3	3	2	3	3	3	3	3	3	3	3	3	3	3	3	3	3	3	3	3	3	3	3	3	3	3	3	3	3	3
20	0	Cairo	Some university	low	5	5	5	4	5	5	5	5	5	5	5	4	4	5	4	5	5	5	5	4	5	5	5	4	3	5	5	5	4	5	4	3	4	5	4	5	5	4	5	4	4	5	5	5	5
22	0	Cairo	Some university	I prefer not to say	3	1	1	3	1	1	5	1	3	1	1	1	1	1	1	1	3	1	2	1	1	1	3	1	1	1	1	1	1	1	5	1	5	3	1	3	4	3	3	3	5	4	1	1	1
29	1	Cairo	Postgraduate degree	moderate high	5	5	5	4	4	5	5	4	5	5	5	5	5	4	4	5	4	4	3	3	3	2	1	1	1	2	3	4	3	1	3	4	4	2	3	4	3	3	3	4	4	3	4	4	4
19	1	Cairo	Some university	low	5	5	5	5	5	5	5	3	3	4	4	4	4	4	3	4	3	5	2	3	3	3	3	3	3	3	3	3	3	3	3	3	3	3	3	3	3	3	3	3	3	3	3	4	4
20	1	Cairo	Bachelor’s degree	low	3	2	4	4	3	2	3	4	3	3	4	4	4	4	4	4	4	4	3	4	4	4	4	4	4	4	3	3	4	3	3	3	2	3	3	3	2	4	3	2	1	3	4	3	3
27	1	Cairo	Bachelor’s degree	low	3	3	3	2	3	3	2	2	4	3	4	3	4	3	4	2	5	4	4	2	3	3	4	2	4	4	3	3	2	3	5	5	5	5	3	4	4	5	3	3	3	3	5	3	3
29	1	Cairo	Postgraduate degree	moderate high	5	5	5	5	5	4	4	4	4	3	3	5	5	2	4	3	1	4	5	4	1	2	5	4	4	5	4	4	3	2	5	5	4	3	4	4	5	5	4	5	5	4	4	4	4
28	1	Cairo	Bachelor’s degree	high	3	1	2	2	2	1	5	1	1	1	1	2	2	1	2	1	4	1	1	2	1	1	1	2	1	2	4	4	1	3	5	5	5	5	4	5	4	4	5	5	5	4	3	3	3
24	1	Cairo	Bachelor’s degree	low	1	1	1	2	3	1	3	3	1	3	3	1	1	5	2	2	3	1	1	1	3	1	5	1	1	1	5	5	5	5	5	5	5	5	5	5	3	5	1	3	3	2	3	3	5
29	1	Cairo	Postgraduate degree	low	5	5	5	5	5	4	5	3	3	3	4	5	5	5	1	1	4	1	2	1	1	1	1	1	1	1	1	3	1	1	4	5	3	5	5	5	5	5	5	5	5	4	4	3	3
16	1	Cairo	Less than high school	low	5	4	4	5	5	3	3	2	5	3	5	4	5	3	3	3	5	3	5	3	2	2	2	3	3	3	4	4	4	4	5	4	4	3	4	5	4	4	4	5	4	4	3	3	3
20	1	Cairo	Bachelor’s degree	low	5	4	4	3	4	4	4	5	4	4	4	4	4	4	4	5	4	3	5	4	3	4	4	4	4	4	4	5	4	2	3	4	4	4	4	4	4	4	4	5	4	4	4	4	5
23	1	Cairo	Bachelor’s degree	low	3	3	3	3	4	4	4	4	2	4	3	4	2	4	5	5	3	4	5	5	1	2	2	2	3	4	4	4	4	2	5	5	5	3	1	1	4	4	4	5	5	4	4	4	4
28	1	Cairo	Bachelor’s degree	moderate low	5	5	5	5	5	3	4	1	3	5	5	5	2	3	3	5	4	3	5	1	1	2	1	3	3	5	5	5	5	5	5	5	5	1	1	4	5	5	5	5	5	5	5	5	5
24	1	Cairo	High school diploma	moderate low	5	4	4	4	4	5	4	3	3	2	4	4	5	3	4	3	4	3	2	4	1	2	3	4	3	4	4	2	1	1	5	5	5	4	1	1	5	4	3	5	4	4	3	3	3
25	1	Cairo	Bachelor’s degree	high	5	5	5	5	5	2	2	2	2	5	3	5	3	1	1	1	3	5	5	5	1	5	3	3	5	5	5	2	1	1	5	5	5	3	3	3	5	5	5	5	5	5	5	5	5
24	1	Cairo	Bachelor’s degree	low	1	1	1	3	4	5	5	5	5	1	5	5	5	1	5	1	5	4	1	1	1	1	1	1	1	1	3	4	4	4	5	5	5	3	3	3	5	5	5	5	5	5	1	4	4
25	1	Cairo	Postgraduate degree	low	5	3	5	2	5	5	2	2	2	2	5	5	5	2	2	2	2	2	3	1	1	4	3	2	2	4	4	1	1	1	5	5	5	5	5	5	5	5	5	4	5	5	5	5	5
23	1	Giza	Bachelor’s degree	low	5	5	5	4	4	2	4	2	4	4	5	5	5	4	5	5	4	2	4	4	2	3	2	2	3	4	4	2	2	3	4	4	4	4	3	3	4	4	4	4	4	4	3	4	4
26	1	Alexandria	Bachelor’s degree	low	4	4	3	3	3	1	3	1	3	2	3	3	3	2	2	2	3	2	3	4	1	2	2	3	3	3	3	1	1	3	4	4	4	2	3	2	3	4	4	4	4	4	4	3	3
22	1	Alexandria	Bachelor’s degree	low	5	5	5	3	5	4	4	2	4	5	5	5	5	3	5	5	5	3	1	1	1	1	1	1	1	1	3	1	1	1	4	5	3	1	1	3	5	5	5	4	5	3	4	4	3
25	1	Alexandria	Bachelor’s degree	low	4	4	3	2	3	2	4	2	5	1	1	4	2	1	1	1	3	3	3	3	3	2	2	3	2	4	2	4	3	1	1	4	3	1	4	1	5	5	5	5	4	5	3	3	4
25	1	Alexandria	Bachelor’s degree	moderate high	5	5	5	2	3	3	4	2	5	5	1	5	4	1	4	2	2	5	5	5	1	2	2	1	4	4	4	1	1	1	4	5	4	4	2	3	5	4	2	3	3	2	4	5	4
14	1	Alexandria	Less than high school	moderate low	5	4	4	3	3	4	4	3	4	3	4	4	3	1	2	2	3	5	5	5	4	5	2	1	2	4	4	5	5	4	3	4	3	2	2	4	4	4	4	4	3	2	3	3	3
18	1	Alexandria	High school diploma	low	3	3	3	2	3	3	4	4	3	2	2	2	2	2	3	2	2	4	3	4	1	3	2	3	2	3	2	4	4	1	4	4	4	4	4	4	4	3	4	3	3	4	2	2	2
16	1	Alexandria	High school diploma	low	5	5	5	2	5	3	4	5	3	1	3	5	5	2	2	2	1	3	5	5	1	3	2	3	1	4	3	4	5	2	5	5	5	5	5	5	5	5	4	5	5	5	3	3	3
18	1	Alexandria	High school diploma	low	5	5	5	5	5	2	4	5	3	5	5	5	5	2	5	5	5	5	5	3	4	3	3	3	2	4	3	4	4	1	4	5	5	2	4	1	5	5	5	5	5	5	5	4	4
23	1	Alexandria	Postgraduate degree	low	3	3	3	3	3	4	5	4	4	3	2	4	2	3	3	2	3	3	3	3	3	2	1	1	1	1	2	4	4	2	5	5	5	4	3	3	5	5	3	5	5	4	3	3	3
28	1	Alexandria	Postgraduate degree	low	5	5	4	5	5	5	5	3	4	5	5	5	5	3	4	5	4	3	5	4	1	3	3	2	2	5	4	5	4	1	5	5	2	4	2	1	3	5	5	5	5	4	5	5	5
14	1	Alexandria	Bachelor’s degree	low	3	3	3	1	1	3	4	3	3	3	3	3	3	3	5	4	3	2	1	1	1	1	1	1	1	1	1	1	1	3	3	5	5	3	3	3	4	5	4	4	3	4	3	3	3
26	1	Alexandria	Bachelor’s degree	moderate low	5	5	5	3	5	2	4	2	5	2	5	4	4	2	2	3	4	2	5	1	1	3	2	4	3	4	4	3	2	4	5	5	4	3	1	4	4	5	4	3	5	4	4	4	5
22	0	Alexandria	Postgraduate degree	low	5	4	4	4	4	4	4	4	4	4	5	5	5	4	4	4	4	5	4	4	5	4	4	4	4	4	4	4	4	4	5	5	5	5	5	4	4	4	4	4	4	4	4	4	4
28	1	Alexandria	Postgraduate degree	low	5	5	3	5	5	3	5	3	5	5	5	5	5	5	3	5	5	5	5	3	3	4	3	2	3	5	4	1	1	1	5	5	5	5	3	2	5	5	5	5	5	5	5	5	5
21	1	Alexandria	High school diploma	low	4	4	4	2	2	4	5	2	5	5	3	5	5	4	3	3	2	5	3	1	3	1	1	1	1	1	1	4	4	4	5	5	5	5	3	3	5	3	1	5	5	3	3	5	4
20	0	Alexandria	Bachelor’s degree	low	5	4	5	3	4	4	4	4	4	4	3	3	3	4	4	4	5	3	4	4	4	3	3	3	3	3	4	3	3	1	5	5	5	5	5	5	4	5	5	5	5	5	5	5	5
24	1	Alexandria	Postgraduate degree	low	4	4	4	5	5	5	5	5	5	5	3	4	5	4	3	5	2	5	5	5	5	5	5	5	5	5	5	4	2	2	5	5	5	3	3	4	4	4	4	5	5	3	5	5	3
20	1	Alexandria	High school diploma	moderate low	5	5	5	3	3	3	5	3	4	3	3	3	3	3	2	2	3	3	5	5	5	1	3	2	2	3	3	3	3	4	5	4	4	5	5	5	5	5	3	3	2	3	3	3	3
22	1	Alexandria	High school diploma	moderate high	4	4	5	5	4	4	4	3	3	4	4	5	5	5	4	4	3	4	5	4	4	4	4	5	4	4	4	4	2	4	4	4	3	4	3	4	4	4	4	5	4	3	4	3	4
22	0	Gharbia	High school diploma	low	3	3	3	3	3	3	3	3	3	3	3	3	3	3	3	3	3	3	3	3	3	3	3	3	3	3	3	3	3	3	4	4	4	4	2	2	4	4	3	3	4	4	3	3	3
23	1	Alexandria	Bachelor’s degree	moderate high	5	5	4	3	4	4	2	4	3	2	5	2	5	4	3	4	3	5	3	4	3	4	2	1	3	4	5	5	3	4	4	4	5	4	4	5	3	3	4	3	4	2	2	3	4
21	0	Alexandria	Bachelor’s degree	low	4	3	3	4	5	3	3	2	5	4	4	3	5	3	4	4	5	5	4	4	3	2	2	2	2	3	3	2	2	2	5	3	3	3	3	4	5	5	5	5	5	5	4	3	4
23	0	Alexandria	Bachelor’s degree	I prefer not to say	5	3	3	3	3	4	3	2	3	3	4	5	5	5	3	3	4	4	3	3	3	3	3	4	3	3	2	4	2	2	5	5	5	5	5	4	5	5	4	4	3	3	5	4	2
21	1	Alexandria	Bachelor’s degree	moderate low	5	4	5	3	3	4	4	3	4	3	3	3	5	2	3	3	3	5	4	4	4	3	4	4	3	5	4	5	4	5	4	3	4	5	5	4	5	3	5	4	5	4	3	4	5
21	1	Alexandria	Bachelor’s degree	low	3	2	2	1	1	3	3	5	5	1	1	3	1	1	1	1	1	1	2	1	5	1	1	1	1	1	1	1	1	1	1	1	1	1	1	1	1	1	1	1	1	1	1	1	1
24	0	Alexandria	High school diploma	low	5	3	4	4	3	5	4	3	2	1	3	4	3	2	1	2	5	4	3	1	1	1	1	1	3	3	1	3	3	2	5	5	5	3	5	5	5	5	3	4	5	3	3	3	3
23	0	Alexandria	Some university	low	3	3	4	4	4	4	4	4	4	4	4	5	3	3	3	3	4	4	3	3	3	3	3	4	3	3	4	3	3	3	3	3	3	3	3	3	3	3	3	3	3	3	4	3	3
21	1	Alexandria	Bachelor’s degree	low	4	4	4	3	3	4	5	5	3	4	4	3	4	1	5	4	4	5	4	4	1	1	2	2	2	2	4	4	4	4	5	5	5	5	2	2	5	5	3	5	5	5	4	4	4
23	0	Alexandria	Some university	low	2	2	2	2	2	2	2	2	2	2	2	2	2	2	2	2	2	2	2	2	2	2	2	2	2	2	2	2	2	3	2	2	2	2	2	2	2	2	2	2	2	2	2	2	2
20	1	Alexandria	Some university	low	2	3	3	2	4	2	3	3	3	3	3	3	3	3	3	3	3	2	3	3	3	3	3	3	3	3	3	3	3	3	3	3	3	3	3	3	3	3	3	3	3	3	3	3	3
22	1	Alexandria	Some university	moderate low	4	4	4	4	3	3	4	3	3	4	4	3	3	3	3	3	3	4	3	3	3	3	3	3	3	3	3	3	3	3	3	3	3	3	3	3	3	3	3	3	3	3	3	3	3
20	1	Alexandria	Bachelor’s degree	low	2	1	1	4	4	2	2	1	3	2	3	1	5	2	3	3	4	2	2	5	1	3	3	2	3	3	4	5	5	4	5	5	4	4	2	2	5	4	5	4	4	5	1	1	1
21	1	Alexandria	Some university	moderate low	3	4	3	4	4	2	2	4	2	3	3	3	3	3	1	3	3	3	5	5	5	5	5	5	5	5	5	5	5	1	5	3	5	5	5	5	4	3	3	5	5	5	4	4	3
22	0	Jeddah	Some university	low	5	3	5	5	4	5	5	2	5	5	5	5	5	5	5	5	5	3	5	2	2	3	2	3	4	4	5	5	5	2	5	3	5	4	4	4	4	5	4	5	5	5	3	5	5
20	1	Jeddah	Bachelor’s degree	moderate low	5	5	5	5	5	5	5	5	5	5	5	5	5	5	5	5	5	5	5	5	5	5	5	5	5	5	5	5	5	5	5	5	5	5	5	5	5	5	5	5	5	5	5	5	5
21	1	Jeddah	Some university	low	3	3	2	3	3	3	3	3	3	3	3	3	3	3	3	3	3	3	3	3	3	3	3	3	3	3	3	3	3	3	3	3	3	3	3	3	3	5	3	5	5	4	3	3	3
20	1	Jeddah	Some university	low	5	5	5	5	5	2	5	2	5	5	5	5	5	3	4	5	5	5	5	5	1	3	5	1	5	5	5	5	3	2	5	4	5	5	5	5	5	3	3	5	5	5	5	5	5
23	0	Jeddah	Some university	low	3	4	3	4	4	3	4	3	2	4	3	4	4	4	4	3	3	3	4	3	3	3	3	3	4	3	2	2	1	2	4	3	2	3	5	5	5	5	5	5	5	5	3	3	3
21	1	Jeddah	Some university	I prefer not to say	5	5	5	5	5	5	5	5	5	5	5	5	3	2	2	3	5	5	2	3	5	3	4	3	3	2	3	5	4	3	3	4	3	4	4	2	2	1	2	2	4	4	2	4	3
19	1	Jeddah	High school diploma	moderate low	5	5	5	5	5	5	5	5	3	5	4	5	5	5	1	5	5	5	5	5	5	2	5	5	5	5	4	5	4	4	5	4	5	5	5	4	4	5	5	3	5	4	4	5	5
20	0	Jeddah	Postgraduate degree	I prefer not to say	2	2	2	2	2	2	2	2	2	3	3	3	3	3	3	3	3	2	3	3	3	3	3	3	3	3	3	3	3	3	3	3	3	3	3	3	3	3	3	3	3	3	3	3	3
20	0	Jeddah	Some university	low	5	5	5	4	5	5	5	5	5	5	5	4	4	5	4	5	5	5	5	4	5	5	5	4	3	5	5	5	4	5	4	3	4	5	4	5	5	4	5	4	4	5	5	5	5
22	0	Jeddah	Some university	I prefer not to say	3	1	1	3	1	1	5	1	3	1	1	1	1	1	1	1	3	1	2	1	1	1	3	1	1	1	1	1	1	1	5	1	5	3	1	3	4	3	3	3	5	4	1	1	1
29	1	Jeddah	Postgraduate degree	moderate high	5	5	5	4	4	5	5	4	5	5	5	5	5	4	4	5	4	4	3	3	3	2	1	1	1	2	3	4	3	1	3	4	4	2	3	4	3	3	3	4	4	3	4	4	4
19	1	Jeddah	Some university	low	5	5	5	5	5	5	5	3	3	4	4	4	4	4	3	4	3	5	2	3	3	3	3	3	3	3	3	3	3	3	3	3	3	3	3	3	3	3	3	3	3	3	3	4	4
20	1	Jeddah	Bachelor’s degree	low	3	2	4	4	3	2	3	4	3	3	4	4	4	4	4	4	4	4	3	4	4	4	4	4	4	4	3	3	4	3	3	3	2	3	3	3	2	4	3	2	1	3	4	3	3
27	1	Jeddah	Bachelor’s degree	low	3	3	3	2	3	3	2	2	4	3	4	3	4	3	4	2	5	4	4	2	3	3	4	2	4	4	3	3	2	3	5	5	5	5	3	4	4	5	3	3	3	3	5	3	3
22	0	Jeddah	Postgraduate degree	low	5	4	4	4	4	4	4	4	4	4	5	5	5	4	4	4	4	5	4	4	5	4	4	4	4	4	4	4	4	4	5	5	5	5	5	4	4	4	4	4	4	4	4	4	4
28	1	Jeddah	Postgraduate degree	low	5	5	3	5	5	3	5	3	5	5	5	5	5	5	3	5	5	5	5	3	3	4	3	2	3	5	4	1	1	1	5	5	5	5	3	2	5	5	5	5	5	5	5	5	5
21	1	Jeddah	High school diploma	low	4	4	4	2	2	4	5	2	5	5	3	5	5	4	3	3	2	5	3	1	3	1	1	1	1	1	1	4	4	4	5	5	5	5	3	3	5	3	1	5	5	3	3	5	4
20	0	Jeddah	Bachelor’s degree	low	5	4	5	3	4	4	4	4	4	4	3	3	3	4	4	4	5	3	4	4	4	3	3	3	3	3	4	3	3	1	5	5	5	5	5	5	4	5	5	5	5	5	5	5	5
24	1	Jeddah	Postgraduate degree	low	4	4	4	5	5	5	5	5	5	5	3	4	5	4	3	5	2	5	5	5	5	5	5	5	5	5	5	4	2	2	5	5	5	3	3	4	4	4	4	5	5	3	5	5	3
20	1	Jeddah	High school diploma	moderate low	5	5	5	3	3	3	5	3	4	3	3	3	3	3	2	2	3	3	5	5	5	1	3	2	2	3	3	3	3	4	5	4	4	5	5	5	5	5	3	3	2	3	3	3	3
22	1	Jeddah	High school diploma	moderate high	4	4	5	5	4	4	4	3	3	4	4	5	5	5	4	4	3	4	5	4	4	4	4	5	4	4	4	4	2	4	4	4	3	4	3	4	4	4	4	5	4	3	4	3	4
22	0	Jeddah	High school diploma	low	3	3	3	3	3	3	3	3	3	3	3	3	3	3	3	3	3	3	3	3	3	3	3	3	3	3	3	3	3	3	4	4	4	4	2	2	4	4	3	3	4	4	3	3	3
23	1	Jeddah	Bachelor’s degree	moderate high	5	5	4	3	4	4	2	4	3	2	5	2	5	4	3	4	3	5	3	4	3	4	2	1	3	4	5	5	3	4	4	4	5	4	4	5	3	3	4	3	4	2	2	3	4
21	0	Jeddah	Bachelor’s degree	low	4	3	3	4	5	3	3	2	5	4	4	3	5	3	4	4	5	5	4	4	3	2	2	2	2	3	3	2	2	2	5	3	3	3	3	4	5	5	5	5	5	5	4	3	4
23	0	Jeddah	Bachelor’s degree	I prefer not to say	5	3	3	3	3	4	3	2	3	3	4	5	5	5	3	3	4	4	3	3	3	3	3	4	3	3	2	4	2	2	5	5	5	5	5	4	5	5	4	4	3	3	5	4	2
21	1	Jeddah	Bachelor’s degree	moderate low	5	4	5	3	3	4	4	3	4	3	3	3	5	2	3	3	3	5	4	4	4	3	4	4	3	5	4	5	4	5	4	3	4	5	5	4	5	3	5	4	5	4	3	4	5
21	1	Jeddah	Bachelor’s degree	low	3	2	2	1	1	3	3	5	5	1	1	3	1	1	1	1	1	1	2	1	5	1	1	1	1	1	1	1	1	1	1	1	1	1	1	1	1	1	1	1	1	1	1	1	1
24	0	Jeddah	High school diploma	low	5	3	4	4	3	5	4	3	2	1	3	4	3	2	1	2	5	4	3	1	1	1	1	1	3	3	1	3	3	2	5	5	5	3	5	5	5	5	3	4	5	3	3	3	3
23	0	Jeddah	Some university	low	3	3	4	4	4	4	4	4	4	4	4	5	3	3	3	3	4	4	3	3	3	3	3	4	3	3	4	3	3	3	3	3	3	3	3	3	3	3	3	3	3	3	4	3	3
21	1	Jeddah	Bachelor’s degree	low	4	4	4	3	3	4	5	5	3	4	4	3	4	1	5	4	4	5	4	4	1	1	2	2	2	2	4	4	4	4	5	5	5	5	2	2	5	5	3	5	5	5	4	4	4
23	0	Jeddah	Some university	low	2	2	2	2	2	2	2	2	2	2	2	2	2	2	2	2	2	2	2	2	2	2	2	2	2	2	2	2	2	3	2	2	2	2	2	2	2	2	2	2	2	2	2	2	2
20	1	Jeddah	Some university	low	2	3	3	2	4	2	3	3	3	3	3	3	3	3	3	3	3	2	3	3	3	3	3	3	3	3	3	3	3	3	3	3	3	3	3	3	3	3	3	3	3	3	3	3	3
22	1	Jeddah	Some university	moderate low	4	4	4	4	3	3	4	3	3	4	4	3	3	3	3	3	3	4	3	3	3	3	3	3	3	3	3	3	3	3	3	3	3	3	3	3	3	3	3	3	3	3	3	3	3
20	1	Jeddah	Bachelor’s degree	low	2	1	1	4	4	2	2	1	3	2	3	1	5	2	3	3	4	2	2	5	1	3	3	2	3	3	4	5	5	4	5	5	4	4	2	2	5	4	5	4	4	5	1	1	1
21	1	Jeddah	Some university	moderate low	3	4	3	4	4	2	2	4	2	3	3	3	3	3	1	3	3	3	5	5	5	5	5	5	5	5	5	5	5	1	5	3	5	5	5	5	4	3	3	5	5	5	4	4	3
22	0	Jeddah	Some university	low	5	3	5	5	4	5	5	2	5	5	5	5	5	5	5	5	5	3	5	2	2	3	2	3	4	4	5	5	5	2	5	3	5	4	4	4	4	5	4	5	5	5	3	5	5
20	1	Jeddah	Bachelor’s degree	moderate low	5	5	5	5	5	5	5	5	5	5	5	5	5	5	5	5	5	5	5	5	5	5	5	5	5	5	5	5	5	5	5	5	5	5	5	5	5	5	5	5	5	5	5	5	5
21	1	Jeddah	Some university	low	3	3	2	3	3	3	3	3	3	3	3	3	3	3	3	3	3	3	3	3	3	3	3	3	3	3	3	3	3	3	3	3	3	3	3	3	3	5	3	5	5	4	3	3	3
20	1	Jeddah	Some university	low	5	5	5	5	5	2	5	2	5	5	5	5	5	3	4	5	5	5	5	5	1	3	5	1	5	5	5	5	3	2	5	4	5	5	5	5	5	3	3	5	5	5	5	5	5
23	0	Jeddah	Some university	low	3	4	3	4	4	3	4	3	2	4	3	4	4	4	4	3	3	3	4	3	3	3	3	3	4	3	2	2	1	2	4	3	2	3	5	5	5	5	5	5	5	5	3	3	3
21	1	Jeddah	Some university	I prefer not to say	5	5	5	5	5	5	5	5	5	5	5	5	3	2	2	3	5	5	2	3	5	3	4	3	3	2	3	5	4	3	3	4	3	4	4	2	2	1	2	2	4	4	2	4	3
19	1	Jeddah	High school diploma	moderate low	5	5	5	5	5	5	5	5	3	5	4	5	5	5	1	5	5	5	5	5	5	2	5	5	5	5	4	5	4	4	5	4	5	5	5	4	4	5	5	3	5	4	4	5	5
20	0	Jeddah	Postgraduate degree	I prefer not to say	2	2	2	2	2	2	2	2	2	3	3	3	3	3	3	3	3	2	3	3	3	3	3	3	3	3	3	3	3	3	3	3	3	3	3	3	3	3	3	3	3	3	3	3	3
20	0	Jeddah	Some university	low	5	5	5	4	5	5	5	5	5	5	5	4	4	5	4	5	5	5	5	4	5	5	5	4	3	5	5	5	4	5	4	3	4	5	4	5	5	4	5	4	4	5	5	5	5
22	0	Jeddah	Some university	I prefer not to say	3	1	1	3	1	1	5	1	3	1	1	1	1	1	1	1	3	1	2	1	1	1	3	1	1	1	1	1	1	1	5	1	5	3	1	3	4	3	3	3	5	4	1	1	1
29	1	Jeddah	Postgraduate degree	moderate high	5	5	5	4	4	5	5	4	5	5	5	5	5	4	4	5	4	4	3	3	3	2	1	1	1	2	3	4	3	1	3	4	4	2	3	4	3	3	3	4	4	3	4	4	4
19	1	Jeddah	Some university	low	5	5	5	5	5	5	5	3	3	4	4	4	4	4	3	4	3	5	2	3	3	3	3	3	3	3	3	3	3	3	3	3	3	3	3	3	3	3	3	3	3	3	3	4	4
20	1	Jeddah	Bachelor’s degree	low	3	2	4	4	3	2	3	4	3	3	4	4	4	4	4	4	4	4	3	4	4	4	4	4	4	4	3	3	4	3	3	3	2	3	3	3	2	4	3	2	1	3	4	3	3
27	1	Jeddah	Bachelor’s degree	low	3	3	3	2	3	3	2	2	4	3	4	3	4	3	4	2	5	4	4	2	3	3	4	2	4	4	3	3	2	3	5	5	5	5	3	4	4	5	3	3	3	3	5	3	3
29	1	Jeddah	Postgraduate degree	moderate high	5	5	5	5	5	4	4	4	4	3	3	5	5	2	4	3	1	4	5	4	1	2	5	4	4	5	4	4	3	2	5	5	4	3	4	4	5	5	4	5	5	4	4	4	4
28	1	Jeddah	Bachelor’s degree	high	3	1	2	2	2	1	5	1	1	1	1	2	2	1	2	1	4	1	1	2	1	1	1	2	1	2	4	4	1	3	5	5	5	5	4	5	4	4	5	5	5	4	3	3	3
24	1	Jeddah	Bachelor’s degree	low	1	1	1	2	3	1	3	3	1	3	3	1	1	5	2	2	3	1	1	1	3	1	5	1	1	1	5	5	5	5	5	5	5	5	5	5	3	5	1	3	3	2	3	3	5
29	1	Jeddah	Postgraduate degree	low	5	5	5	5	5	4	5	3	3	3	4	5	5	5	1	1	4	1	2	1	1	1	1	1	1	1	1	3	1	1	4	5	3	5	5	5	5	5	5	5	5	4	4	3	3
16	1	Jeddah	Less than high school	low	5	4	4	5	5	3	3	2	5	3	5	4	5	3	3	3	5	3	5	3	2	2	2	3	3	3	4	4	4	4	5	4	4	3	4	5	4	4	4	5	4	4	3	3	3
20	1	Jeddah	Bachelor’s degree	low	5	4	4	3	4	4	4	5	4	4	4	4	4	4	4	5	4	3	5	4	3	4	4	4	4	4	4	5	4	2	3	4	4	4	4	4	4	4	4	5	4	4	4	4	5
23	1	Jeddah	Bachelor’s degree	low	3	3	3	3	4	4	4	4	2	4	3	4	2	4	5	5	3	4	5	5	1	2	2	2	3	4	4	4	4	2	5	5	5	3	1	1	4	4	4	5	5	4	4	4	4
28	1	Jeddah	Bachelor’s degree	moderate low	5	5	5	5	5	3	4	1	3	5	5	5	2	3	3	5	4	3	5	1	1	2	1	3	3	5	5	5	5	5	5	5	5	1	1	4	5	5	5	5	5	5	5	5	5
24	1	Jeddah	High school diploma	moderate low	5	4	4	4	4	5	4	3	3	2	4	4	5	3	4	3	4	3	2	4	1	2	3	4	3	4	4	2	1	1	5	5	5	4	1	1	5	4	3	5	4	4	3	3	3
25	1	Jeddah	Bachelor’s degree	high	5	5	5	5	5	2	2	2	2	5	3	5	3	1	1	1	3	5	5	5	1	5	3	3	5	5	5	2	1	1	5	5	5	3	3	3	5	5	5	5	5	5	5	5	5
22	0	Jeddah	Postgraduate degree	low	5	4	4	4	4	4	4	4	4	4	5	5	5	4	4	4	4	5	4	4	5	4	4	4	4	4	4	4	4	4	5	5	5	5	5	4	4	4	4	4	4	4	4	4	4
28	1	Jeddah	Postgraduate degree	low	5	5	3	5	5	3	5	3	5	5	5	5	5	5	3	5	5	5	5	3	3	4	3	2	3	5	4	1	1	1	5	5	5	5	3	2	5	5	5	5	5	5	5	5	5
21	1	Madinah	High school diploma	low	4	4	4	2	2	4	5	2	5	5	3	5	5	4	3	3	2	5	3	1	3	1	1	1	1	1	1	4	4	4	5	5	5	5	3	3	5	3	1	5	5	3	3	5	4
20	0	Madinah	Bachelor’s degree	low	5	4	5	3	4	4	4	4	4	4	3	3	3	4	4	4	5	3	4	4	4	3	3	3	3	3	4	3	3	1	5	5	5	5	5	5	4	5	5	5	5	5	5	5	5
24	1	Madinah	Postgraduate degree	low	4	4	4	5	5	5	5	5	5	5	3	4	5	4	3	5	2	5	5	5	5	5	5	5	5	5	5	4	2	2	5	5	5	3	3	4	4	4	4	5	5	3	5	5	3
20	1	Madinah	High school diploma	moderate low	5	5	5	3	3	3	5	3	4	3	3	3	3	3	2	2	3	3	5	5	5	1	3	2	2	3	3	3	3	4	5	4	4	5	5	5	5	5	3	3	2	3	3	3	3
22	1	Madinah	High school diploma	moderate high	4	4	5	5	4	4	4	3	3	4	4	5	5	5	4	4	3	4	5	4	4	4	4	5	4	4	4	4	2	4	4	4	3	4	3	4	4	4	4	5	4	3	4	3	4
22	0	Madinah	High school diploma	low	3	3	3	3	3	3	3	3	3	3	3	3	3	3	3	3	3	3	3	3	3	3	3	3	3	3	3	3	3	3	4	4	4	4	2	2	4	4	3	3	4	4	3	3	3
23	1	Madinah	Bachelor’s degree	moderate high	5	5	4	3	4	4	2	4	3	2	5	2	5	4	3	4	3	5	3	4	3	4	2	1	3	4	5	5	3	4	4	4	5	4	4	5	3	3	4	3	4	2	2	3	4
21	0	Madinah	Bachelor’s degree	low	4	3	3	4	5	3	3	2	5	4	4	3	5	3	4	4	5	5	4	4	3	2	2	2	2	3	3	2	2	2	5	3	3	3	3	4	5	5	5	5	5	5	4	3	4
23	0	Madinah	Bachelor’s degree	I prefer not to say	5	3	3	3	3	4	3	2	3	3	4	5	5	5	3	3	4	4	3	3	3	3	3	4	3	3	2	4	2	2	5	5	5	5	5	4	5	5	4	4	3	3	5	4	2
21	1	Madinah	Bachelor’s degree	moderate low	5	4	5	3	3	4	4	3	4	3	3	3	5	2	3	3	3	5	4	4	4	3	4	4	3	5	4	5	4	5	4	3	4	5	5	4	5	3	5	4	5	4	3	4	5
21	1	Madinah	Bachelor’s degree	low	3	2	2	1	1	3	3	5	5	1	1	3	1	1	1	1	1	1	2	1	5	1	1	1	1	1	1	1	1	1	1	1	1	1	1	1	1	1	1	1	1	1	1	1	1
24	0	Madinah	High school diploma	low	5	3	4	4	3	5	4	3	2	1	3	4	3	2	1	2	5	4	3	1	1	1	1	1	3	3	1	3	3	2	5	5	5	3	5	5	5	5	3	4	5	3	3	3	3
23	0	Madinah	Some university	low	3	3	4	4	4	4	4	4	4	4	4	5	3	3	3	3	4	4	3	3	3	3	3	4	3	3	4	3	3	3	3	3	3	3	3	3	3	3	3	3	3	3	4	3	3
21	1	Madinah	Bachelor’s degree	low	4	4	4	3	3	4	5	5	3	4	4	3	4	1	5	4	4	5	4	4	1	1	2	2	2	2	4	4	4	4	5	5	5	5	2	2	5	5	3	5	5	5	4	4	4
23	0	Madinah	Some university	low	2	2	2	2	2	2	2	2	2	2	2	2	2	2	2	2	2	2	2	2	2	2	2	2	2	2	2	2	2	3	2	2	2	2	2	2	2	2	2	2	2	2	2	2	2
20	1	Madinah	Some university	low	2	3	3	2	4	2	3	3	3	3	3	3	3	3	3	3	3	2	3	3	3	3	3	3	3	3	3	3	3	3	3	3	3	3	3	3	3	3	3	3	3	3	3	3	3
22	1	Madinah	Some university	moderate low	4	4	4	4	3	3	4	3	3	4	4	3	3	3	3	3	3	4	3	3	3	3	3	3	3	3	3	3	3	3	3	3	3	3	3	3	3	3	3	3	3	3	3	3	3
20	1	Madinah	Bachelor’s degree	low	2	1	1	4	4	2	2	1	3	2	3	1	5	2	3	3	4	2	2	5	1	3	3	2	3	3	4	5	5	4	5	5	4	4	2	2	5	4	5	4	4	5	1	1	1
21	1	Madinah	Some university	moderate low	3	4	3	4	4	2	2	4	2	3	3	3	3	3	1	3	3	3	5	5	5	5	5	5	5	5	5	5	5	1	5	3	5	5	5	5	4	3	3	5	5	5	4	4	3
22	0	Madinah	Some university	low	5	3	5	5	4	5	5	2	5	5	5	5	5	5	5	5	5	3	5	2	2	3	2	3	4	4	5	5	5	2	5	3	5	4	4	4	4	5	4	5	5	5	3	5	5
20	1	Madinah	Bachelor’s degree	moderate low	5	5	5	5	5	5	5	5	5	5	5	5	5	5	5	5	5	5	5	5	5	5	5	5	5	5	5	5	5	5	5	5	5	5	5	5	5	5	5	5	5	5	5	5	5
21	1	Madinah	Some university	low	3	3	2	3	3	3	3	3	3	3	3	3	3	3	3	3	3	3	3	3	3	3	3	3	3	3	3	3	3	3	3	3	3	3	3	3	3	5	3	5	5	4	3	3	3
20	1	Madinah	Some university	low	5	5	5	5	5	2	5	2	5	5	5	5	5	3	4	5	5	5	5	5	1	3	5	1	5	5	5	5	3	2	5	4	5	5	5	5	5	3	3	5	5	5	5	5	5
23	0	Madinah	Some university	low	3	4	3	4	4	3	4	3	2	4	3	4	4	4	4	3	3	3	4	3	3	3	3	3	4	3	2	2	1	2	4	3	2	3	5	5	5	5	5	5	5	5	3	3	3
21	1	Madinah	Some university	I prefer not to say	5	5	5	5	5	5	5	5	5	5	5	5	3	2	2	3	5	5	2	3	5	3	4	3	3	2	3	5	4	3	3	4	3	4	4	2	2	1	2	2	4	4	2	4	3
19	1	Madinah	High school diploma	moderate low	5	5	5	5	5	5	5	5	3	5	4	5	5	5	1	5	5	5	5	5	5	2	5	5	5	5	4	5	4	4	5	4	5	5	5	4	4	5	5	3	5	4	4	5	5
20	0	Madinah	Postgraduate degree	I prefer not to say	2	2	2	2	2	2	2	2	2	3	3	3	3	3	3	3	3	2	3	3	3	3	3	3	3	3	3	3	3	3	3	3	3	3	3	3	3	3	3	3	3	3	3	3	3
20	0	Madinah	Some university	low	5	5	5	4	5	5	5	5	5	5	5	4	4	5	4	5	5	5	5	4	5	5	5	4	3	5	5	5	4	5	4	3	4	5	4	5	5	4	5	4	4	5	5	5	5
22	0	Madinah	Some university	I prefer not to say	3	1	1	3	1	1	5	1	3	1	1	1	1	1	1	1	3	1	2	1	1	1	3	1	1	1	1	1	1	1	5	1	5	3	1	3	4	3	3	3	5	4	1	1	1
29	1	Madinah	Postgraduate degree	moderate high	5	5	5	4	4	5	5	4	5	5	5	5	5	4	4	5	4	4	3	3	3	2	1	1	1	2	3	4	3	1	3	4	4	2	3	4	3	3	3	4	4	3	4	4	4
19	1	Madinah	Some university	low	5	5	5	5	5	5	5	3	3	4	4	4	4	4	3	4	3	5	2	3	3	3	3	3	3	3	3	3	3	3	3	3	3	3	3	3	3	3	3	3	3	3	3	4	4
20	1	Madinah	Bachelor’s degree	low	3	2	4	4	3	2	3	4	3	3	4	4	4	4	4	4	4	4	3	4	4	4	4	4	4	4	3	3	4	3	3	3	2	3	3	3	2	4	3	2	1	3	4	3	3
27	1	Madinah	Bachelor’s degree	low	3	3	3	2	3	3	2	2	4	3	4	3	4	3	4	2	5	4	4	2	3	3	4	2	4	4	3	3	2	3	5	5	5	5	3	4	4	5	3	3	3	3	5	3	3
29	1	Madinah	Postgraduate degree	moderate high	5	5	5	5	5	4	4	4	4	3	3	5	5	2	4	3	1	4	5	4	1	2	5	4	4	5	4	4	3	2	5	5	4	3	4	4	5	5	4	5	5	4	4	4	4
28	1	Madinah	Bachelor’s degree	high	3	1	2	2	2	1	5	1	1	1	1	2	2	1	2	1	4	1	1	2	1	1	1	2	1	2	4	4	1	3	5	5	5	5	4	5	4	4	5	5	5	4	3	3	3
24	1	Madinah	Bachelor’s degree	low	1	1	1	2	3	1	3	3	1	3	3	1	1	5	2	2	3	1	1	1	3	1	5	1	1	1	5	5	5	5	5	5	5	5	5	5	3	5	1	3	3	2	3	3	5
29	1	Madinah	Postgraduate degree	low	5	5	5	5	5	4	5	3	3	3	4	5	5	5	1	1	4	1	2	1	1	1	1	1	1	1	1	3	1	1	4	5	3	5	5	5	5	5	5	5	5	4	4	3	3
16	1	Madinah	Less than high school	low	5	4	4	5	5	3	3	2	5	3	5	4	5	3	3	3	5	3	5	3	2	2	2	3	3	3	4	4	4	4	5	4	4	3	4	5	4	4	4	5	4	4	3	3	3
20	1	Madinah	Bachelor’s degree	low	5	4	4	3	4	4	4	5	4	4	4	4	4	4	4	5	4	3	5	4	3	4	4	4	4	4	4	5	4	2	3	4	4	4	4	4	4	4	4	5	4	4	4	4	5
23	1	Madinah	Bachelor’s degree	low	3	3	3	3	4	4	4	4	2	4	3	4	2	4	5	5	3	4	5	5	1	2	2	2	3	4	4	4	4	2	5	5	5	3	1	1	4	4	4	5	5	4	4	4	4
22	0	Madinah	Postgraduate degree	low	5	4	4	4	4	4	4	4	4	4	5	5	5	4	4	4	4	5	4	4	5	4	4	4	4	4	4	4	4	4	5	5	5	5	5	4	4	4	4	4	4	4	4	4	4
28	1	Madinah	Postgraduate degree	low	5	5	3	5	5	3	5	3	5	5	5	5	5	5	3	5	5	5	5	3	3	4	3	2	3	5	4	1	1	1	5	5	5	5	3	2	5	5	5	5	5	5	5	5	5
21	1	Madinah	High school diploma	low	4	4	4	2	2	4	5	2	5	5	3	5	5	4	3	3	2	5	3	1	3	1	1	1	1	1	1	4	4	4	5	5	5	5	3	3	5	3	1	5	5	3	3	5	4
20	0	Madinah	Bachelor’s degree	low	5	4	5	3	4	4	4	4	4	4	3	3	3	4	4	4	5	3	4	4	4	3	3	3	3	3	4	3	3	1	5	5	5	5	5	5	4	5	5	5	5	5	5	5	5
24	1	Madinah	Postgraduate degree	low	4	4	4	5	5	5	5	5	5	5	3	4	5	4	3	5	2	5	5	5	5	5	5	5	5	5	5	4	2	2	5	5	5	3	3	4	4	4	4	5	5	3	5	5	3
20	1	Madinah	High school diploma	moderate low	5	5	5	3	3	3	5	3	4	3	3	3	3	3	2	2	3	3	5	5	5	1	3	2	2	3	3	3	3	4	5	4	4	5	5	5	5	5	3	3	2	3	3	3	3
22	1	Madinah	High school diploma	moderate high	4	4	5	5	4	4	4	3	3	4	4	5	5	5	4	4	3	4	5	4	4	4	4	5	4	4	4	4	2	4	4	4	3	4	3	4	4	4	4	5	4	3	4	3	4
22	0	Madinah	High school diploma	low	3	3	3	3	3	3	3	3	3	3	3	3	3	3	3	3	3	3	3	3	3	3	3	3	3	3	3	3	3	3	4	4	4	4	2	2	4	4	3	3	4	4	3	3	3
23	1	Madinah	Bachelor’s degree	moderate high	5	5	4	3	4	4	2	4	3	2	5	2	5	4	3	4	3	5	3	4	3	4	2	1	3	4	5	5	3	4	4	4	5	4	4	5	3	3	4	3	4	2	2	3	4
21	0	Madinah	Bachelor’s degree	low	4	3	3	4	5	3	3	2	5	4	4	3	5	3	4	4	5	5	4	4	3	2	2	2	2	3	3	2	2	2	5	3	3	3	3	4	5	5	5	5	5	5	4	3	4
23	0	Madinah	Bachelor’s degree	I prefer not to say	5	3	3	3	3	4	3	2	3	3	4	5	5	5	3	3	4	4	3	3	3	3	3	4	3	3	2	4	2	2	5	5	5	5	5	4	5	5	4	4	3	3	5	4	2
21	1	Madinah	Bachelor’s degree	moderate low	5	4	5	3	3	4	4	3	4	3	3	3	5	2	3	3	3	5	4	4	4	3	4	4	3	5	4	5	4	5	4	3	4	5	5	4	5	3	5	4	5	4	3	4	5
21	1	Madinah	Bachelor’s degree	low	3	2	2	1	1	3	3	5	5	1	1	3	1	1	1	1	1	1	2	1	5	1	1	1	1	1	1	1	1	1	1	1	1	1	1	1	1	1	1	1	1	1	1	1	1
24	0	Madinah	High school diploma	low	5	3	4	4	3	5	4	3	2	1	3	4	3	2	1	2	5	4	3	1	1	1	1	1	3	3	1	3	3	2	5	5	5	3	5	5	5	5	3	4	5	3	3	3	3
23	0	Madinah	Some university	low	3	3	4	4	4	4	4	4	4	4	4	5	3	3	3	3	4	4	3	3	3	3	3	4	3	3	4	3	3	3	3	3	3	3	3	3	3	3	3	3	3	3	4	3	3
21	1	Madinah	Bachelor’s degree	low	4	4	4	3	3	4	5	5	3	4	4	3	4	1	5	4	4	5	4	4	1	1	2	2	2	2	4	4	4	4	5	5	5	5	2	2	5	5	3	5	5	5	4	4	4
23	0	Lusail	Some university	low	2	2	2	2	2	2	2	2	2	2	2	2	2	2	2	2	2	2	2	2	2	2	2	2	2	2	2	2	2	3	2	2	2	2	2	2	2	2	2	2	2	2	2	2	2
20	1	Lusail	Some university	low	2	3	3	2	4	2	3	3	3	3	3	3	3	3	3	3	3	2	3	3	3	3	3	3	3	3	3	3	3	3	3	3	3	3	3	3	3	3	3	3	3	3	3	3	3
22	1	Lusail	Some university	moderate low	4	4	4	4	3	3	4	3	3	4	4	3	3	3	3	3	3	4	3	3	3	3	3	3	3	3	3	3	3	3	3	3	3	3	3	3	3	3	3	3	3	3	3	3	3
20	1	Lusail	Bachelor’s degree	low	2	1	1	4	4	2	2	1	3	2	3	1	5	2	3	3	4	2	2	5	1	3	3	2	3	3	4	5	5	4	5	5	4	4	2	2	5	4	5	4	4	5	1	1	1
21	1	Lusail	Some university	moderate low	3	4	3	4	4	2	2	4	2	3	3	3	3	3	1	3	3	3	5	5	5	5	5	5	5	5	5	5	5	1	5	3	5	5	5	5	4	3	3	5	5	5	4	4	3
22	0	Lusail	Some university	low	5	3	5	5	4	5	5	2	5	5	5	5	5	5	5	5	5	3	5	2	2	3	2	3	4	4	5	5	5	2	5	3	5	4	4	4	4	5	4	5	5	5	3	5	5
20	1	Lusail	Bachelor’s degree	moderate low	5	5	5	5	5	5	5	5	5	5	5	5	5	5	5	5	5	5	5	5	5	5	5	5	5	5	5	5	5	5	5	5	5	5	5	5	5	5	5	5	5	5	5	5	5
21	1	Lusail	Some university	low	3	3	2	3	3	3	3	3	3	3	3	3	3	3	3	3	3	3	3	3	3	3	3	3	3	3	3	3	3	3	3	3	3	3	3	3	3	5	3	5	5	4	3	3	3
20	1	Lusail	Some university	low	5	5	5	5	5	2	5	2	5	5	5	5	5	3	4	5	5	5	5	5	1	3	5	1	5	5	5	5	3	2	5	4	5	5	5	5	5	3	3	5	5	5	5	5	5
23	0	Lusail	Some university	low	3	4	3	4	4	3	4	3	2	4	3	4	4	4	4	3	3	3	4	3	3	3	3	3	4	3	2	2	1	2	4	3	2	3	5	5	5	5	5	5	5	5	3	3	3
21	1	Lusail	Some university	I prefer not to say	5	5	5	5	5	5	5	5	5	5	5	5	3	2	2	3	5	5	2	3	5	3	4	3	3	2	3	5	4	3	3	4	3	4	4	2	2	1	2	2	4	4	2	4	3
19	1	Lusail	High school diploma	moderate low	5	5	5	5	5	5	5	5	3	5	4	5	5	5	1	5	5	5	5	5	5	2	5	5	5	5	4	5	4	4	5	4	5	5	5	4	4	5	5	3	5	4	4	5	5
20	0	Lusail	Postgraduate degree	I prefer not to say	2	2	2	2	2	2	2	2	2	3	3	3	3	3	3	3	3	2	3	3	3	3	3	3	3	3	3	3	3	3	3	3	3	3	3	3	3	3	3	3	3	3	3	3	3
20	0	Lusail	Some university	low	5	5	5	4	5	5	5	5	5	5	5	4	4	5	4	5	5	5	5	4	5	5	5	4	3	5	5	5	4	5	4	3	4	5	4	5	5	4	5	4	4	5	5	5	5
22	0	Lusail	Some university	I prefer not to say	3	1	1	3	1	1	5	1	3	1	1	1	1	1	1	1	3	1	2	1	1	1	3	1	1	1	1	1	1	1	5	1	5	3	1	3	4	3	3	3	5	4	1	1	1
29	1	Lusail	Postgraduate degree	moderate high	5	5	5	4	4	5	5	4	5	5	5	5	5	4	4	5	4	4	3	3	3	2	1	1	1	2	3	4	3	1	3	4	4	2	3	4	3	3	3	4	4	3	4	4	4
19	1	Lusail	Some university	low	5	5	5	5	5	5	5	3	3	4	4	4	4	4	3	4	3	5	2	3	3	3	3	3	3	3	3	3	3	3	3	3	3	3	3	3	3	3	3	3	3	3	3	4	4
20	1	Lusail	Bachelor’s degree	low	3	2	4	4	3	2	3	4	3	3	4	4	4	4	4	4	4	4	3	4	4	4	4	4	4	4	3	3	4	3	3	3	2	3	3	3	2	4	3	2	1	3	4	3	3
27	1	Lusail	Bachelor’s degree	low	3	3	3	2	3	3	2	2	4	3	4	3	4	3	4	2	5	4	4	2	3	3	4	2	4	4	3	3	2	3	5	5	5	5	3	4	4	5	3	3	3	3	5	3	3
29	1	Lusail	Postgraduate degree	moderate high	5	5	5	5	5	4	4	4	4	3	3	5	5	2	4	3	1	4	5	4	1	2	5	4	4	5	4	4	3	2	5	5	4	3	4	4	5	5	4	5	5	4	4	4	4
28	1	Lusail	Bachelor’s degree	high	3	1	2	2	2	1	5	1	1	1	1	2	2	1	2	1	4	1	1	2	1	1	1	2	1	2	4	4	1	3	5	5	5	5	4	5	4	4	5	5	5	4	3	3	3
24	1	Lusail	Bachelor’s degree	low	1	1	1	2	3	1	3	3	1	3	3	1	1	5	2	2	3	1	1	1	3	1	5	1	1	1	5	5	5	5	5	5	5	5	5	5	3	5	1	3	3	2	3	3	5
29	1	Lusail	Postgraduate degree	low	5	5	5	5	5	4	5	3	3	3	4	5	5	5	1	1	4	1	2	1	1	1	1	1	1	1	1	3	1	1	4	5	3	5	5	5	5	5	5	5	5	4	4	3	3
16	1	Lusail	Less than high school	low	5	4	4	5	5	3	3	2	5	3	5	4	5	3	3	3	5	3	5	3	2	2	2	3	3	3	4	4	4	4	5	4	4	3	4	5	4	4	4	5	4	4	3	3	3
20	1	Lusail	Bachelor’s degree	low	5	4	4	3	4	4	4	5	4	4	4	4	4	4	4	5	4	3	5	4	3	4	4	4	4	4	4	5	4	2	3	4	4	4	4	4	4	4	4	5	4	4	4	4	5
23	1	Lusail	Bachelor’s degree	low	3	3	3	3	4	4	4	4	2	4	3	4	2	4	5	5	3	4	5	5	1	2	2	2	3	4	4	4	4	2	5	5	5	3	1	1	4	4	4	5	5	4	4	4	4
28	1	Lusail	Bachelor’s degree	moderate low	5	5	5	5	5	3	4	1	3	5	5	5	2	3	3	5	4	3	5	1	1	2	1	3	3	5	5	5	5	5	5	5	5	1	1	4	5	5	5	5	5	5	5	5	5
24	1	Lusail	High school diploma	moderate low	5	4	4	4	4	5	4	3	3	2	4	4	5	3	4	3	4	3	2	4	1	2	3	4	3	4	4	2	1	1	5	5	5	4	1	1	5	4	3	5	4	4	3	3	3
25	1	Lusail	Bachelor’s degree	high	5	5	5	5	5	2	2	2	2	5	3	5	3	1	1	1	3	5	5	5	1	5	3	3	5	5	5	2	1	1	5	5	5	3	3	3	5	5	5	5	5	5	5	5	5
24	1	Lusail	Bachelor’s degree	low	1	1	1	3	4	5	5	5	5	1	5	5	5	1	5	1	5	4	1	1	1	1	1	1	1	1	3	4	4	4	5	5	5	3	3	3	5	5	5	5	5	5	1	4	4
25	1	Lusail	Postgraduate degree	low	5	3	5	2	5	5	2	2	2	2	5	5	5	2	2	2	2	2	3	1	1	4	3	2	2	4	4	1	1	1	5	5	5	5	5	5	5	5	5	4	5	5	5	5	5
22	0	Lusail	Postgraduate degree	low	5	4	4	4	4	4	4	4	4	4	5	5	5	4	4	4	4	5	4	4	5	4	4	4	4	4	4	4	4	4	5	5	5	5	5	4	4	4	4	4	4	4	4	4	4
28	1	Lusail	Postgraduate degree	low	5	5	3	5	5	3	5	3	5	5	5	5	5	5	3	5	5	5	5	3	3	4	3	2	3	5	4	1	1	1	5	5	5	5	3	2	5	5	5	5	5	5	5	5	5
21	1	Lusail	High school diploma	low	4	4	4	2	2	4	5	2	5	5	3	5	5	4	3	3	2	5	3	1	3	1	1	1	1	1	1	4	4	4	5	5	5	5	3	3	5	3	1	5	5	3	3	5	4
20	0	Lusail	Bachelor’s degree	low	5	4	5	3	4	4	4	4	4	4	3	3	3	4	4	4	5	3	4	4	4	3	3	3	3	3	4	3	3	1	5	5	5	5	5	5	4	5	5	5	5	5	5	5	5
24	1	Lusail	Postgraduate degree	low	4	4	4	5	5	5	5	5	5	5	3	4	5	4	3	5	2	5	5	5	5	5	5	5	5	5	5	4	2	2	5	5	5	3	3	4	4	4	4	5	5	3	5	5	3
20	1	Lusail	High school diploma	moderate low	5	5	5	3	3	3	5	3	4	3	3	3	3	3	2	2	3	3	5	5	5	1	3	2	2	3	3	3	3	4	5	4	4	5	5	5	5	5	3	3	2	3	3	3	3
22	1	Lusail	High school diploma	moderate high	4	4	5	5	4	4	4	3	3	4	4	5	5	5	4	4	3	4	5	4	4	4	4	5	4	4	4	4	2	4	4	4	3	4	3	4	4	4	4	5	4	3	4	3	4
22	0	Lusail	High school diploma	low	3	3	3	3	3	3	3	3	3	3	3	3	3	3	3	3	3	3	3	3	3	3	3	3	3	3	3	3	3	3	4	4	4	4	2	2	4	4	3	3	4	4	3	3	3
23	1	Lusail	Bachelor’s degree	moderate high	5	5	4	3	4	4	2	4	3	2	5	2	5	4	3	4	3	5	3	4	3	4	2	1	3	4	5	5	3	4	4	4	5	4	4	5	3	3	4	3	4	2	2	3	4
21	0	Lusail	Bachelor’s degree	low	4	3	3	4	5	3	3	2	5	4	4	3	5	3	4	4	5	5	4	4	3	2	2	2	2	3	3	2	2	2	5	3	3	3	3	4	5	5	5	5	5	5	4	3	4
23	0	Lusail	Bachelor’s degree	I prefer not to say	5	3	3	3	3	4	3	2	3	3	4	5	5	5	3	3	4	4	3	3	3	3	3	4	3	3	2	4	2	2	5	5	5	5	5	4	5	5	4	4	3	3	5	4	2
21	1	Lusail	Bachelor’s degree	moderate low	5	4	5	3	3	4	4	3	4	3	3	3	5	2	3	3	3	5	4	4	4	3	4	4	3	5	4	5	4	5	4	3	4	5	5	4	5	3	5	4	5	4	3	4	5
21	1	Lusail	Bachelor’s degree	low	3	2	2	1	1	3	3	5	5	1	1	3	1	1	1	1	1	1	2	1	5	1	1	1	1	1	1	1	1	1	1	1	1	1	1	1	1	1	1	1	1	1	1	1	1
24	0	Lusail	High school diploma	low	5	3	4	4	3	5	4	3	2	1	3	4	3	2	1	2	5	4	3	1	1	1	1	1	3	3	1	3	3	2	5	5	5	3	5	5	5	5	3	4	5	3	3	3	3
23	0	Lusail	Some university	low	3	3	4	4	4	4	4	4	4	4	4	5	3	3	3	3	4	4	3	3	3	3	3	4	3	3	4	3	3	3	3	3	3	3	3	3	3	3	3	3	3	3	4	3	3
21	1	Dubai	Bachelor’s degree	low	4	4	4	3	3	4	5	5	3	4	4	3	4	1	5	4	4	5	4	4	1	1	2	2	2	2	4	4	4	4	5	5	5	5	2	2	5	5	3	5	5	5	4	4	4
23	0	Dubai	Some university	low	2	2	2	2	2	2	2	2	2	2	2	2	2	2	2	2	2	2	2	2	2	2	2	2	2	2	2	2	2	3	2	2	2	2	2	2	2	2	2	2	2	2	2	2	2
20	1	Dubai	Some university	low	2	3	3	2	4	2	3	3	3	3	3	3	3	3	3	3	3	2	3	3	3	3	3	3	3	3	3	3	3	3	3	3	3	3	3	3	3	3	3	3	3	3	3	3	3
22	1	Dubai	Some university	moderate low	4	4	4	4	3	3	4	3	3	4	4	3	3	3	3	3	3	4	3	3	3	3	3	3	3	3	3	3	3	3	3	3	3	3	3	3	3	3	3	3	3	3	3	3	3
20	1	Dubai	Bachelor’s degree	low	2	1	1	4	4	2	2	1	3	2	3	1	5	2	3	3	4	2	2	5	1	3	3	2	3	3	4	5	5	4	5	5	4	4	2	2	5	4	5	4	4	5	1	1	1
21	1	Dubai	Some university	moderate low	3	4	3	4	4	2	2	4	2	3	3	3	3	3	1	3	3	3	5	5	5	5	5	5	5	5	5	5	5	1	5	3	5	5	5	5	4	3	3	5	5	5	4	4	3
22	0	Dubai	Some university	low	5	3	5	5	4	5	5	2	5	5	5	5	5	5	5	5	5	3	5	2	2	3	2	3	4	4	5	5	5	2	5	3	5	4	4	4	4	5	4	5	5	5	3	5	5
20	1	Dubai	Bachelor’s degree	moderate low	5	5	5	5	5	5	5	5	5	5	5	5	5	5	5	5	5	5	5	5	5	5	5	5	5	5	5	5	5	5	5	5	5	5	5	5	5	5	5	5	5	5	5	5	5
21	1	Dubai	Some university	low	3	3	2	3	3	3	3	3	3	3	3	3	3	3	3	3	3	3	3	3	3	3	3	3	3	3	3	3	3	3	3	3	3	3	3	3	3	5	3	5	5	4	3	3	3
20	1	Dubai	Some university	low	5	5	5	5	5	2	5	2	5	5	5	5	5	3	4	5	5	5	5	5	1	3	5	1	5	5	5	5	3	2	5	4	5	5	5	5	5	3	3	5	5	5	5	5	5
23	0	Dubai	Some university	low	3	4	3	4	4	3	4	3	2	4	3	4	4	4	4	3	3	3	4	3	3	3	3	3	4	3	2	2	1	2	4	3	2	3	5	5	5	5	5	5	5	5	3	3	3
21	1	Dubai	Some university	I prefer not to say	5	5	5	5	5	5	5	5	5	5	5	5	3	2	2	3	5	5	2	3	5	3	4	3	3	2	3	5	4	3	3	4	3	4	4	2	2	1	2	2	4	4	2	4	3
19	1	Dubai	High school diploma	moderate low	5	5	5	5	5	5	5	5	3	5	4	5	5	5	1	5	5	5	5	5	5	2	5	5	5	5	4	5	4	4	5	4	5	5	5	4	4	5	5	3	5	4	4	5	5
20	0	Dubai	Postgraduate degree	I prefer not to say	2	2	2	2	2	2	2	2	2	3	3	3	3	3	3	3	3	2	3	3	3	3	3	3	3	3	3	3	3	3	3	3	3	3	3	3	3	3	3	3	3	3	3	3	3
20	0	Dubai	Some university	low	5	5	5	4	5	5	5	5	5	5	5	4	4	5	4	5	5	5	5	4	5	5	5	4	3	5	5	5	4	5	4	3	4	5	4	5	5	4	5	4	4	5	5	5	5
22	0	Dubai	Some university	I prefer not to say	3	1	1	3	1	1	5	1	3	1	1	1	1	1	1	1	3	1	2	1	1	1	3	1	1	1	1	1	1	1	5	1	5	3	1	3	4	3	3	3	5	4	1	1	1
29	1	Dubai	Postgraduate degree	moderate high	5	5	5	4	4	5	5	4	5	5	5	5	5	4	4	5	4	4	3	3	3	2	1	1	1	2	3	4	3	1	3	4	4	2	3	4	3	3	3	4	4	3	4	4	4
19	1	Dubai	Some university	low	5	5	5	5	5	5	5	3	3	4	4	4	4	4	3	4	3	5	2	3	3	3	3	3	3	3	3	3	3	3	3	3	3	3	3	3	3	3	3	3	3	3	3	4	4
20	1	Dubai	Bachelor’s degree	low	3	2	4	4	3	2	3	4	3	3	4	4	4	4	4	4	4	4	3	4	4	4	4	4	4	4	3	3	4	3	3	3	2	3	3	3	2	4	3	2	1	3	4	3	3
27	1	Dubai	Bachelor’s degree	low	3	3	3	2	3	3	2	2	4	3	4	3	4	3	4	2	5	4	4	2	3	3	4	2	4	4	3	3	2	3	5	5	5	5	3	4	4	5	3	3	3	3	5	3	3
29	1	Dubai	Postgraduate degree	moderate high	5	5	5	5	5	4	4	4	4	3	3	5	5	2	4	3	1	4	5	4	1	2	5	4	4	5	4	4	3	2	5	5	4	3	4	4	5	5	4	5	5	4	4	4	4
28	1	Dubai	Bachelor’s degree	high	3	1	2	2	2	1	5	1	1	1	1	2	2	1	2	1	4	1	1	2	1	1	1	2	1	2	4	4	1	3	5	5	5	5	4	5	4	4	5	5	5	4	3	3	3
24	1	Dubai	Bachelor’s degree	low	1	1	1	2	3	1	3	3	1	3	3	1	1	5	2	2	3	1	1	1	3	1	5	1	1	1	5	5	5	5	5	5	5	5	5	5	3	5	1	3	3	2	3	3	5
29	1	Dubai	Postgraduate degree	low	5	5	5	5	5	4	5	3	3	3	4	5	5	5	1	1	4	1	2	1	1	1	1	1	1	1	1	3	1	1	4	5	3	5	5	5	5	5	5	5	5	4	4	3	3
16	1	Dubai	Less than high school	low	5	4	4	5	5	3	3	2	5	3	5	4	5	3	3	3	5	3	5	3	2	2	2	3	3	3	4	4	4	4	5	4	4	3	4	5	4	4	4	5	4	4	3	3	3
20	1	Dubai	Bachelor’s degree	low	5	4	4	3	4	4	4	5	4	4	4	4	4	4	4	5	4	3	5	4	3	4	4	4	4	4	4	5	4	2	3	4	4	4	4	4	4	4	4	5	4	4	4	4	5
23	1	Dubai	Bachelor’s degree	low	3	3	3	3	4	4	4	4	2	4	3	4	2	4	5	5	3	4	5	5	1	2	2	2	3	4	4	4	4	2	5	5	5	3	1	1	4	4	4	5	5	4	4	4	4
28	1	Dubai	Bachelor’s degree	moderate low	5	5	5	5	5	3	4	1	3	5	5	5	2	3	3	5	4	3	5	1	1	2	1	3	3	5	5	5	5	5	5	5	5	1	1	4	5	5	5	5	5	5	5	5	5
24	1	Dubai	High school diploma	moderate low	5	4	4	4	4	5	4	3	3	2	4	4	5	3	4	3	4	3	2	4	1	2	3	4	3	4	4	2	1	1	5	5	5	4	1	1	5	4	3	5	4	4	3	3	3
25	1	Dubai	Bachelor’s degree	high	5	5	5	5	5	2	2	2	2	5	3	5	3	1	1	1	3	5	5	5	1	5	3	3	5	5	5	2	1	1	5	5	5	3	3	3	5	5	5	5	5	5	5	5	5
24	1	Dubai	Bachelor’s degree	low	1	1	1	3	4	5	5	5	5	1	5	5	5	1	5	1	5	4	1	1	1	1	1	1	1	1	3	4	4	4	5	5	5	3	3	3	5	5	5	5	5	5	1	4	4
25	1	Dubai	Postgraduate degree	low	5	3	5	2	5	5	2	2	2	2	5	5	5	2	2	2	2	2	3	1	1	4	3	2	2	4	4	1	1	1	5	5	5	5	5	5	5	5	5	4	5	5	5	5	5
23	1	Dubai	Bachelor’s degree	low	5	5	5	4	4	2	4	2	4	4	5	5	5	4	5	5	4	2	4	4	2	3	2	2	3	4	4	2	2	3	4	4	4	4	3	3	4	4	4	4	4	4	3	4	4
26	1	Dubai	Bachelor’s degree	low	4	4	3	3	3	1	3	1	3	2	3	3	3	2	2	2	3	2	3	4	1	2	2	3	3	3	3	1	1	3	4	4	4	2	3	2	3	4	4	4	4	4	4	3	3
22	1	Dubai	Bachelor’s degree	low	5	5	5	3	5	4	4	2	4	5	5	5	5	3	5	5	5	3	1	1	1	1	1	1	1	1	3	1	1	1	4	5	3	1	1	3	5	5	5	4	5	3	4	4	3
25	1	Dubai	Bachelor’s degree	low	4	4	3	2	3	2	4	2	5	1	1	4	2	1	1	1	3	3	3	3	3	2	2	3	2	4	2	4	3	1	1	4	3	1	4	1	5	5	5	5	4	5	3	3	4
25	1	Dubai	Bachelor’s degree	moderate high	5	5	5	2	3	3	4	2	5	5	1	5	4	1	4	2	2	5	5	5	1	2	2	1	4	4	4	1	1	1	4	5	4	4	2	3	5	4	2	3	3	2	4	5	4
14	1	Dubai	Less than high school	moderate low	5	4	4	3	3	4	4	3	4	3	4	4	3	1	2	2	3	5	5	5	4	5	2	1	2	4	4	5	5	4	3	4	3	2	2	4	4	4	4	4	3	2	3	3	3
18	1	Dubai	High school diploma	low	3	3	3	2	3	3	4	4	3	2	2	2	2	2	3	2	2	4	3	4	1	3	2	3	2	3	2	4	4	1	4	4	4	4	4	4	4	3	4	3	3	4	2	2	2
16	1	Dubai	High school diploma	low	5	5	5	2	5	3	4	5	3	1	3	5	5	2	2	2	1	3	5	5	1	3	2	3	1	4	3	4	5	2	5	5	5	5	5	5	5	5	4	5	5	5	3	3	3
18	1	Dubai	High school diploma	low	5	5	5	5	5	2	4	5	3	5	5	5	5	2	5	5	5	5	5	3	4	3	3	3	2	4	3	4	4	1	4	5	5	2	4	1	5	5	5	5	5	5	5	4	4
23	1	Dubai	Postgraduate degree	low	3	3	3	3	3	4	5	4	4	3	2	4	2	3	3	2	3	3	3	3	3	2	1	1	1	1	2	4	4	2	5	5	5	4	3	3	5	5	3	5	5	4	3	3	3
28	1	Dubai	Postgraduate degree	low	5	5	4	5	5	5	5	3	4	5	5	5	5	3	4	5	4	3	5	4	1	3	3	2	2	5	4	5	4	1	5	5	2	4	2	1	3	5	5	5	5	4	5	5	5
14	1	Dubai	Bachelor’s degree	low	3	3	3	1	1	3	4	3	3	3	3	3	3	3	5	4	3	2	1	1	1	1	1	1	1	1	1	1	1	3	3	5	5	3	3	3	4	5	4	4	3	4	3	3	3
22	0	Dubai	Postgraduate degree	low	5	4	4	4	4	4	4	4	4	4	5	5	5	4	4	4	4	5	4	4	5	4	4	4	4	4	4	4	4	4	5	5	5	5	5	4	4	4	4	4	4	4	4	4	4
28	1	Dubai	Postgraduate degree	low	5	5	3	5	5	3	5	3	5	5	5	5	5	5	3	5	5	5	5	3	3	4	3	2	3	5	4	1	1	1	5	5	5	5	3	2	5	5	5	5	5	5	5	5	5
21	1	Dubai	High school diploma	low	4	4	4	2	2	4	5	2	5	5	3	5	5	4	3	3	2	5	3	1	3	1	1	1	1	1	1	4	4	4	5	5	5	5	3	3	5	3	1	5	5	3	3	5	4
20	0	Dubai	Bachelor’s degree	low	5	4	5	3	4	4	4	4	4	4	3	3	3	4	4	4	5	3	4	4	4	3	3	3	3	3	4	3	3	1	5	5	5	5	5	5	4	5	5	5	5	5	5	5	5
24	1	Dubai	Postgraduate degree	low	4	4	4	5	5	5	5	5	5	5	3	4	5	4	3	5	2	5	5	5	5	5	5	5	5	5	5	4	2	2	5	5	5	3	3	4	4	4	4	5	5	3	5	5	3
20	1	Dubai	High school diploma	moderate low	5	5	5	3	3	3	5	3	4	3	3	3	3	3	2	2	3	3	5	5	5	1	3	2	2	3	3	3	3	4	5	4	4	5	5	5	5	5	3	3	2	3	3	3	3
22	1	Alexandria	High school diploma	moderate high	4	4	5	5	4	4	4	3	3	4	4	5	5	5	4	4	3	4	5	4	4	4	4	5	4	4	4	4	2	4	4	4	3	4	3	4	4	4	4	5	4	3	4	3	4
22	0	Gharbia	High school diploma	low	3	3	3	3	3	3	3	3	3	3	3	3	3	3	3	3	3	3	3	3	3	3	3	3	3	3	3	3	3	3	4	4	4	4	2	2	4	4	3	3	4	4	3	3	3
23	1	Alexandria	Bachelor’s degree	moderate high	5	5	4	3	4	4	2	4	3	2	5	2	5	4	3	4	3	5	3	4	3	4	2	1	3	4	5	5	3	4	4	4	5	4	4	5	3	3	4	3	4	2	2	3	4
21	0	Alexandria	Bachelor’s degree	low	4	3	3	4	5	3	3	2	5	4	4	3	5	3	4	4	5	5	4	4	3	2	2	2	2	3	3	2	2	2	5	3	3	3	3	4	5	5	5	5	5	5	4	3	4
23	0	Alexandria	Bachelor’s degree	I prefer not to say	5	3	3	3	3	4	3	2	3	3	4	5	5	5	3	3	4	4	3	3	3	3	3	4	3	3	2	4	2	2	5	5	5	5	5	4	5	5	4	4	3	3	5	4	2
21	1	Alexandria	Bachelor’s degree	moderate low	5	4	5	3	3	4	4	3	4	3	3	3	5	2	3	3	3	5	4	4	4	3	4	4	3	5	4	5	4	5	4	3	4	5	5	4	5	3	5	4	5	4	3	4	5
21	1	Alexandria	Bachelor’s degree	low	3	2	2	1	1	3	3	5	5	1	1	3	1	1	1	1	1	1	2	1	5	1	1	1	1	1	1	1	1	1	1	1	1	1	1	1	1	1	1	1	1	1	1	1	1
24	0	Alexandria	High school diploma	low	5	3	4	4	3	5	4	3	2	1	3	4	3	2	1	2	5	4	3	1	1	1	1	1	3	3	1	3	3	2	5	5	5	3	5	5	5	5	3	4	5	3	3	3	3
23	0	Alexandria	Some university	low	3	3	4	4	4	4	4	4	4	4	4	5	3	3	3	3	4	4	3	3	3	3	3	4	3	3	4	3	3	3	3	3	3	3	3	3	3	3	3	3	3	3	4	3	3
21	1	Alexandria	Bachelor’s degree	low	4	4	4	3	3	4	5	5	3	4	4	3	4	1	5	4	4	5	4	4	1	1	2	2	2	2	4	4	4	4	5	5	5	5	2	2	5	5	3	5	5	5	4	4	4
23	0	Alexandria	Some university	low	2	2	2	2	2	2	2	2	2	2	2	2	2	2	2	2	2	2	2	2	2	2	2	2	2	2	2	2	2	3	2	2	2	2	2	2	2	2	2	2	2	2	2	2	2
20	1	Alexandria	Some university	low	2	3	3	2	4	2	3	3	3	3	3	3	3	3	3	3	3	2	3	3	3	3	3	3	3	3	3	3	3	3	3	3	3	3	3	3	3	3	3	3	3	3	3	3	3
22	1	Alexandria	Some university	moderate low	4	4	4	4	3	3	4	3	3	4	4	3	3	3	3	3	3	4	3	3	3	3	3	3	3	3	3	3	3	3	3	3	3	3	3	3	3	3	3	3	3	3	3	3	3
20	1	Alexandria	Bachelor’s degree	low	2	1	1	4	4	2	2	1	3	2	3	1	5	2	3	3	4	2	2	5	1	3	3	2	3	3	4	5	5	4	5	5	4	4	2	2	5	4	5	4	4	5	1	1	1
21	1	Alexandria	Some university	moderate low	3	4	3	4	4	2	2	4	2	3	3	3	3	3	1	3	3	3	5	5	5	5	5	5	5	5	5	5	5	1	5	3	5	5	5	5	4	3	3	5	5	5	4	4	3
22	0	Gharbia	Some university	low	5	3	5	5	4	5	5	2	5	5	5	5	5	5	5	5	5	3	5	2	2	3	2	3	4	4	5	5	5	2	5	3	5	4	4	4	4	5	4	5	5	5	3	5	5
20	1	Alexandria	Bachelor’s degree	moderate low	5	5	5	5	5	5	5	5	5	5	5	5	5	5	5	5	5	5	5	5	5	5	5	5	5	5	5	5	5	5	5	5	5	5	5	5	5	5	5	5	5	5	5	5	5
21	1	Alexandria	Some university	low	3	3	2	3	3	3	3	3	3	3	3	3	3	3	3	3	3	3	3	3	3	3	3	3	3	3	3	3	3	3	3	3	3	3	3	3	3	5	3	5	5	4	3	3	3
20	1	Alexandria	Some university	low	5	5	5	5	5	2	5	2	5	5	5	5	5	3	4	5	5	5	5	5	1	3	5	1	5	5	5	5	3	2	5	4	5	5	5	5	5	3	3	5	5	5	5	5	5
23	0	Alexandria	Some university	low	3	4	3	4	4	3	4	3	2	4	3	4	4	4	4	3	3	3	4	3	3	3	3	3	4	3	2	2	1	2	4	3	2	3	5	5	5	5	5	5	5	5	3	3	3
21	1	Alexandria	Some university	I prefer not to say	5	5	5	5	5	5	5	5	5	5	5	5	3	2	2	3	5	5	2	3	5	3	4	3	3	2	3	5	4	3	3	4	3	4	4	2	2	1	2	2	4	4	2	4	3
19	1	Alexandria	High school diploma	moderate low	5	5	5	5	5	5	5	5	3	5	4	5	5	5	1	5	5	5	5	5	5	2	5	5	5	5	4	5	4	4	5	4	5	5	5	4	4	5	5	3	5	4	4	5	5
20	0	Alexandria	Postgraduate degree	I prefer not to say	2	2	2	2	2	2	2	2	2	3	3	3	3	3	3	3	3	2	3	3	3	3	3	3	3	3	3	3	3	3	3	3	3	3	3	3	3	3	3	3	3	3	3	3	3
20	0	Alexandria	Some university	low	5	5	5	4	5	5	5	5	5	5	5	4	4	5	4	5	5	5	5	4	5	5	5	4	3	5	5	5	4	5	4	3	4	5	4	5	5	4	5	4	4	5	5	5	5
22	0	Alexandria	Some university	I prefer not to say	3	1	1	3	1	1	5	1	3	1	1	1	1	1	1	1	3	1	2	1	1	1	3	1	1	1	1	1	1	1	5	1	5	3	1	3	4	3	3	3	5	4	1	1	1
29	1	Alexandria	Postgraduate degree	moderate high	5	5	5	4	4	5	5	4	5	5	5	5	5	4	4	5	4	4	3	3	3	2	1	1	1	2	3	4	3	1	3	4	4	2	3	4	3	3	3	4	4	3	4	4	4
19	1	Alexandria	Some university	low	5	5	5	5	5	5	5	3	3	4	4	4	4	4	3	4	3	5	2	3	3	3	3	3	3	3	3	3	3	3	3	3	3	3	3	3	3	3	3	3	3	3	3	4	4
20	1	Alexandria	Bachelor’s degree	low	3	2	4	4	3	2	3	4	3	3	4	4	4	4	4	4	4	4	3	4	4	4	4	4	4	4	3	3	4	3	3	3	2	3	3	3	2	4	3	2	1	3	4	3	3
27	1	Alexandria	Bachelor’s degree	low	3	3	3	2	3	3	2	2	4	3	4	3	4	3	4	2	5	4	4	2	3	3	4	2	4	4	3	3	2	3	5	5	5	5	3	4	4	5	3	3	3	3	5	3	3
29	1	Alexandria	Postgraduate degree	moderate high	5	5	5	5	5	4	4	4	4	3	3	5	5	2	4	3	1	4	5	4	1	2	5	4	4	5	4	4	3	2	5	5	4	3	4	4	5	5	4	5	5	4	4	4	4
22	0	Alexandria	Postgraduate degree	low	5	4	4	4	4	4	4	4	4	4	5	5	5	4	4	4	4	5	4	4	5	4	4	4	4	4	4	4	4	4	5	5	5	5	5	4	4	4	4	4	4	4	4	4	4
28	1	Alexandria	Postgraduate degree	low	5	5	3	5	5	3	5	3	5	5	5	5	5	5	3	5	5	5	5	3	3	4	3	2	3	5	4	1	1	1	5	5	5	5	3	2	5	5	5	5	5	5	5	5	5
21	1	Alexandria	High school diploma	low	4	4	4	2	2	4	5	2	5	5	3	5	5	4	3	3	2	5	3	1	3	1	1	1	1	1	1	4	4	4	5	5	5	5	3	3	5	3	1	5	5	3	3	5	4
20	0	Alexandria	Bachelor’s degree	low	5	4	5	3	4	4	4	4	4	4	3	3	3	4	4	4	5	3	4	4	4	3	3	3	3	3	4	3	3	1	5	5	5	5	5	5	4	5	5	5	5	5	5	5	5
24	1	Alexandria	Postgraduate degree	low	4	4	4	5	5	5	5	5	5	5	3	4	5	4	3	5	2	5	5	5	5	5	5	5	5	5	5	4	2	2	5	5	5	3	3	4	4	4	4	5	5	3	5	5	3
20	1	Alexandria	High school diploma	moderate low	5	5	5	3	3	3	5	3	4	3	3	3	3	3	2	2	3	3	5	5	5	1	3	2	2	3	3	3	3	4	5	4	4	5	5	5	5	5	3	3	2	3	3	3	3
22	1	Alexandria	High school diploma	moderate high	4	4	5	5	4	4	4	3	3	4	4	5	5	5	4	4	3	4	5	4	4	4	4	5	4	4	4	4	2	4	4	4	3	4	3	4	4	4	4	5	4	3	4	3	4
22	0	Gharbia	High school diploma	low	3	3	3	3	3	3	3	3	3	3	3	3	3	3	3	3	3	3	3	3	3	3	3	3	3	3	3	3	3	3	4	4	4	4	2	2	4	4	3	3	4	4	3	3	3
23	1	Alexandria	Bachelor’s degree	moderate high	5	5	4	3	4	4	2	4	3	2	5	2	5	4	3	4	3	5	3	4	3	4	2	1	3	4	5	5	3	4	4	4	5	4	4	5	3	3	4	3	4	2	2	3	4
21	0	Alexandria	Bachelor’s degree	low	4	3	3	4	5	3	3	2	5	4	4	3	5	3	4	4	5	5	4	4	3	2	2	2	2	3	3	2	2	2	5	3	3	3	3	4	5	5	5	5	5	5	4	3	4
23	0	Alexandria	Bachelor’s degree	I prefer not to say	5	3	3	3	3	4	3	2	3	3	4	5	5	5	3	3	4	4	3	3	3	3	3	4	3	3	2	4	2	2	5	5	5	5	5	4	5	5	4	4	3	3	5	4	2
21	1	Alexandria	Bachelor’s degree	moderate low	5	4	5	3	3	4	4	3	4	3	3	3	5	2	3	3	3	5	4	4	4	3	4	4	3	5	4	5	4	5	4	3	4	5	5	4	5	3	5	4	5	4	3	4	5
21	1	Alexandria	Bachelor’s degree	low	3	2	2	1	1	3	3	5	5	1	1	3	1	1	1	1	1	1	2	1	5	1	1	1	1	1	1	1	1	1	1	1	1	1	1	1	1	1	1	1	1	1	1	1	1
24	0	Alexandria	High school diploma	low	5	3	4	4	3	5	4	3	2	1	3	4	3	2	1	2	5	4	3	1	1	1	1	1	3	3	1	3	3	2	5	5	5	3	5	5	5	5	3	4	5	3	3	3	3
23	0	Alexandria	Some university	low	3	3	4	4	4	4	4	4	4	4	4	5	3	3	3	3	4	4	3	3	3	3	3	4	3	3	4	3	3	3	3	3	3	3	3	3	3	3	3	3	3	3	4	3	3
21	1	Alexandria	Bachelor’s degree	low	4	4	4	3	3	4	5	5	3	4	4	3	4	1	5	4	4	5	4	4	1	1	2	2	2	2	4	4	4	4	5	5	5	5	2	2	5	5	3	5	5	5	4	4	4
23	0	Alexandria	Some university	low	2	2	2	2	2	2	2	2	2	2	2	2	2	2	2	2	2	2	2	2	2	2	2	2	2	2	2	2	2	3	2	2	2	2	2	2	2	2	2	2	2	2	2	2	2
20	1	Alexandria	Some university	low	2	3	3	2	4	2	3	3	3	3	3	3	3	3	3	3	3	2	3	3	3	3	3	3	3	3	3	3	3	3	3	3	3	3	3	3	3	3	3	3	3	3	3	3	3
22	1	Alexandria	Some university	moderate low	4	4	4	4	3	3	4	3	3	4	4	3	3	3	3	3	3	4	3	3	3	3	3	3	3	3	3	3	3	3	3	3	3	3	3	3	3	3	3	3	3	3	3	3	3
20	1	Alexandria	Bachelor’s degree	low	2	1	1	4	4	2	2	1	3	2	3	1	5	2	3	3	4	2	2	5	1	3	3	2	3	3	4	5	5	4	5	5	4	4	2	2	5	4	5	4	4	5	1	1	1
21	1	Alexandria	Some university	moderate low	3	4	3	4	4	2	2	4	2	3	3	3	3	3	1	3	3	3	5	5	5	5	5	5	5	5	5	5	5	1	5	3	5	5	5	5	4	3	3	5	5	5	4	4	3
22	0	Gharbia	Some university	low	5	3	5	5	4	5	5	2	5	5	5	5	5	5	5	5	5	3	5	2	2	3	2	3	4	4	5	5	5	2	5	3	5	4	4	4	4	5	4	5	5	5	3	5	5
20	1	Alexandria	Bachelor’s degree	moderate low	5	5	5	5	5	5	5	5	5	5	5	5	5	5	5	5	5	5	5	5	5	5	5	5	5	5	5	5	5	5	5	5	5	5	5	5	5	5	5	5	5	5	5	5	5
21	1	Alexandria	Some university	low	3	3	2	3	3	3	3	3	3	3	3	3	3	3	3	3	3	3	3	3	3	3	3	3	3	3	3	3	3	3	3	3	3	3	3	3	3	5	3	5	5	4	3	3	3
20	1	Alexandria	Some university	low	5	5	5	5	5	2	5	2	5	5	5	5	5	3	4	5	5	5	5	5	1	3	5	1	5	5	5	5	3	2	5	4	5	5	5	5	5	3	3	5	5	5	5	5	5
23	0	Alexandria	Some university	low	3	4	3	4	4	3	4	3	2	4	3	4	4	4	4	3	3	3	4	3	3	3	3	3	4	3	2	2	1	2	4	3	2	3	5	5	5	5	5	5	5	5	3	3	3
21	1	Alexandria	Some university	I prefer not to say	5	5	5	5	5	5	5	5	5	5	5	5	3	2	2	3	5	5	2	3	5	3	4	3	3	2	3	5	4	3	3	4	3	4	4	2	2	1	2	2	4	4	2	4	3
19	1	Alexandria	High school diploma	moderate low	5	5	5	5	5	5	5	5	3	5	4	5	5	5	1	5	5	5	5	5	5	2	5	5	5	5	4	5	4	4	5	4	5	5	5	4	4	5	5	3	5	4	4	5	5
20	0	Alexandria	Postgraduate degree	I prefer not to say	2	2	2	2	2	2	2	2	2	3	3	3	3	3	3	3	3	2	3	3	3	3	3	3	3	3	3	3	3	3	3	3	3	3	3	3	3	3	3	3	3	3	3	3	3
20	0	Alexandria	Some university	low	5	5	5	4	5	5	5	5	5	5	5	4	4	5	4	5	5	5	5	4	5	5	5	4	3	5	5	5	4	5	4	3	4	5	4	5	5	4	5	4	4	5	5	5	5
22	0	Alexandria	Some university	I prefer not to say	3	1	1	3	1	1	5	1	3	1	1	1	1	1	1	1	3	1	2	1	1	1	3	1	1	1	1	1	1	1	5	1	5	3	1	3	4	3	3	3	5	4	1	1	1
29	1	Alexandria	Postgraduate degree	moderate high	5	5	5	4	4	5	5	4	5	5	5	5	5	4	4	5	4	4	3	3	3	2	1	1	1	2	3	4	3	1	3	4	4	2	3	4	3	3	3	4	4	3	4	4	4
19	1	Alexandria	Some university	low	5	5	5	5	5	5	5	3	3	4	4	4	4	4	3	4	3	5	2	3	3	3	3	3	3	3	3	3	3	3	3	3	3	3	3	3	3	3	3	3	3	3	3	4	4
20	1	Alexandria	Bachelor’s degree	low	3	2	4	4	3	2	3	4	3	3	4	4	4	4	4	4	4	4	3	4	4	4	4	4	4	4	3	3	4	3	3	3	2	3	3	3	2	4	3	2	1	3	4	3	3
27	1	Alexandria	Bachelor’s degree	low	3	3	3	2	3	3	2	2	4	3	4	3	4	3	4	2	5	4	4	2	3	3	4	2	4	4	3	3	2	3	5	5	5	5	3	4	4	5	3	3	3	3	5	3	3
29	1	Alexandria	Postgraduate degree	moderate high	5	5	5	5	5	4	4	4	4	3	3	5	5	2	4	3	1	4	5	4	1	2	5	4	4	5	4	4	3	2	5	5	4	3	4	4	5	5	4	5	5	4	4	4	4
28	1	Cairo	Bachelor’s degree	high	3	1	2	2	2	1	5	1	1	1	1	2	2	1	2	1	4	1	1	2	1	1	1	2	1	2	4	4	1	3	5	5	5	5	4	5	4	4	5	5	5	4	3	3	3
24	1	Alexandria	Bachelor’s degree	low	1	1	1	2	3	1	3	3	1	3	3	1	1	5	2	2	3	1	1	1	3	1	5	1	1	1	5	5	5	5	5	5	5	5	5	5	3	5	1	3	3	2	3	3	5
29	1	Alexandria	Postgraduate degree	low	5	5	5	5	5	4	5	3	3	3	4	5	5	5	1	1	4	1	2	1	1	1	1	1	1	1	1	3	1	1	4	5	3	5	5	5	5	5	5	5	5	4	4	3	3
16	1	Alexandria	Less than high school	low	5	4	4	5	5	3	3	2	5	3	5	4	5	3	3	3	5	3	5	3	2	2	2	3	3	3	4	4	4	4	5	4	4	3	4	5	4	4	4	5	4	4	3	3	3
20	1	Alexandria	Bachelor’s degree	low	5	4	4	3	4	4	4	5	4	4	4	4	4	4	4	5	4	3	5	4	3	4	4	4	4	4	4	5	4	2	3	4	4	4	4	4	4	4	4	5	4	4	4	4	5
23	1	Alexandria	Bachelor’s degree	low	3	3	3	3	4	4	4	4	2	4	3	4	2	4	5	5	3	4	5	5	1	2	2	2	3	4	4	4	4	2	5	5	5	3	1	1	4	4	4	5	5	4	4	4	4
28	1	Alexandria	Bachelor’s degree	moderate low	5	5	5	5	5	3	4	1	3	5	5	5	2	3	3	5	4	3	5	1	1	2	1	3	3	5	5	5	5	5	5	5	5	1	1	4	5	5	5	5	5	5	5	5	5
24	1	Alexandria	High school diploma	moderate low	5	4	4	4	4	5	4	3	3	2	4	4	5	3	4	3	4	3	2	4	1	2	3	4	3	4	4	2	1	1	5	5	5	4	1	1	5	4	3	5	4	4	3	3	3
25	1	Alexandria	Bachelor’s degree	high	5	5	5	5	5	2	2	2	2	5	3	5	3	1	1	1	3	5	5	5	1	5	3	3	5	5	5	2	1	1	5	5	5	3	3	3	5	5	5	5	5	5	5	5	5
24	1	Alexandria	Bachelor’s degree	low	1	1	1	3	4	5	5	5	5	1	5	5	5	1	5	1	5	4	1	1	1	1	1	1	1	1	3	4	4	4	5	5	5	3	3	3	5	5	5	5	5	5	1	4	4
25	1	Alexandria	Postgraduate degree	low	5	3	5	2	5	5	2	2	2	2	5	5	5	2	2	2	2	2	3	1	1	4	3	2	2	4	4	1	1	1	5	5	5	5	5	5	5	5	5	4	5	5	5	5	5
23	1	Giza	Bachelor’s degree	low	5	5	5	4	4	2	4	2	4	4	5	5	5	4	5	5	4	2	4	4	2	3	2	2	3	4	4	2	2	3	4	4	4	4	3	3	4	4	4	4	4	4	3	4	4
26	1	Alexandria	Bachelor’s degree	low	4	4	3	3	3	1	3	1	3	2	3	3	3	2	2	2	3	2	3	4	1	2	2	3	3	3	3	1	1	3	4	4	4	2	3	2	3	4	4	4	4	4	4	3	3
22	1	Alexandria	Bachelor’s degree	low	5	5	5	3	5	4	4	2	4	5	5	5	5	3	5	5	5	3	1	1	1	1	1	1	1	1	3	1	1	1	4	5	3	1	1	3	5	5	5	4	5	3	4	4	3
25	1	Alexandria	Bachelor’s degree	low	4	4	3	2	3	2	4	2	5	1	1	4	2	1	1	1	3	3	3	3	3	2	2	3	2	4	2	4	3	1	1	4	3	1	4	1	5	5	5	5	4	5	3	3	4
25	1	Alexandria	Bachelor’s degree	moderate high	5	5	5	2	3	3	4	2	5	5	1	5	4	1	4	2	2	5	5	5	1	2	2	1	4	4	4	1	1	1	4	5	4	4	2	3	5	4	2	3	3	2	4	5	4
14	1	Alexandria	Less than high school	moderate low	5	4	4	3	3	4	4	3	4	3	4	4	3	1	2	2	3	5	5	5	4	5	2	1	2	4	4	5	5	4	3	4	3	2	2	4	4	4	4	4	3	2	3	3	3
18	1	Alexandria	High school diploma	low	3	3	3	2	3	3	4	4	3	2	2	2	2	2	3	2	2	4	3	4	1	3	2	3	2	3	2	4	4	1	4	4	4	4	4	4	4	3	4	3	3	4	2	2	2
16	1	Alexandria	High school diploma	low	5	5	5	2	5	3	4	5	3	1	3	5	5	2	2	2	1	3	5	5	1	3	2	3	1	4	3	4	5	2	5	5	5	5	5	5	5	5	4	5	5	5	3	3	3
18	1	Alexandria	High school diploma	low	5	5	5	5	5	2	4	5	3	5	5	5	5	2	5	5	5	5	5	3	4	3	3	3	2	4	3	4	4	1	4	5	5	2	4	1	5	5	5	5	5	5	5	4	4
23	1	Alexandria	Postgraduate degree	low	3	3	3	3	3	4	5	4	4	3	2	4	2	3	3	2	3	3	3	3	3	2	1	1	1	1	2	4	4	2	5	5	5	4	3	3	5	5	3	5	5	4	3	3	3
28	1	Alexandria	Postgraduate degree	low	5	5	4	5	5	5	5	3	4	5	5	5	5	3	4	5	4	3	5	4	1	3	3	2	2	5	4	5	4	1	5	5	2	4	2	1	3	5	5	5	5	4	5	5	5
14	1	Alexandria	Bachelor’s degree	low	3	3	3	1	1	3	4	3	3	3	3	3	3	3	5	4	3	2	1	1	1	1	1	1	1	1	1	1	1	3	3	5	5	3	3	3	4	5	4	4	3	4	3	3	3
26	1	Alexandria	Bachelor’s degree	moderate low	5	5	5	3	5	2	4	2	5	2	5	4	4	2	2	3	4	2	5	1	1	3	2	4	3	4	4	3	2	4	5	5	4	3	1	4	4	5	4	3	5	4	4	4	5
